# Supplementary material
Source: PubMed Central journal article supplement (PMC6937556)
Supplement: supp_RA119.011177_155994_2_supp_428162_q0vchl.pdf [file supp_RA119.011177_155994_2_supp_428162_q0vchl.pdf]

KSGK (cTnT 197-200)

YDIEAKVTK (cTnI 112-120)

cTnT K197 – cTnI K117

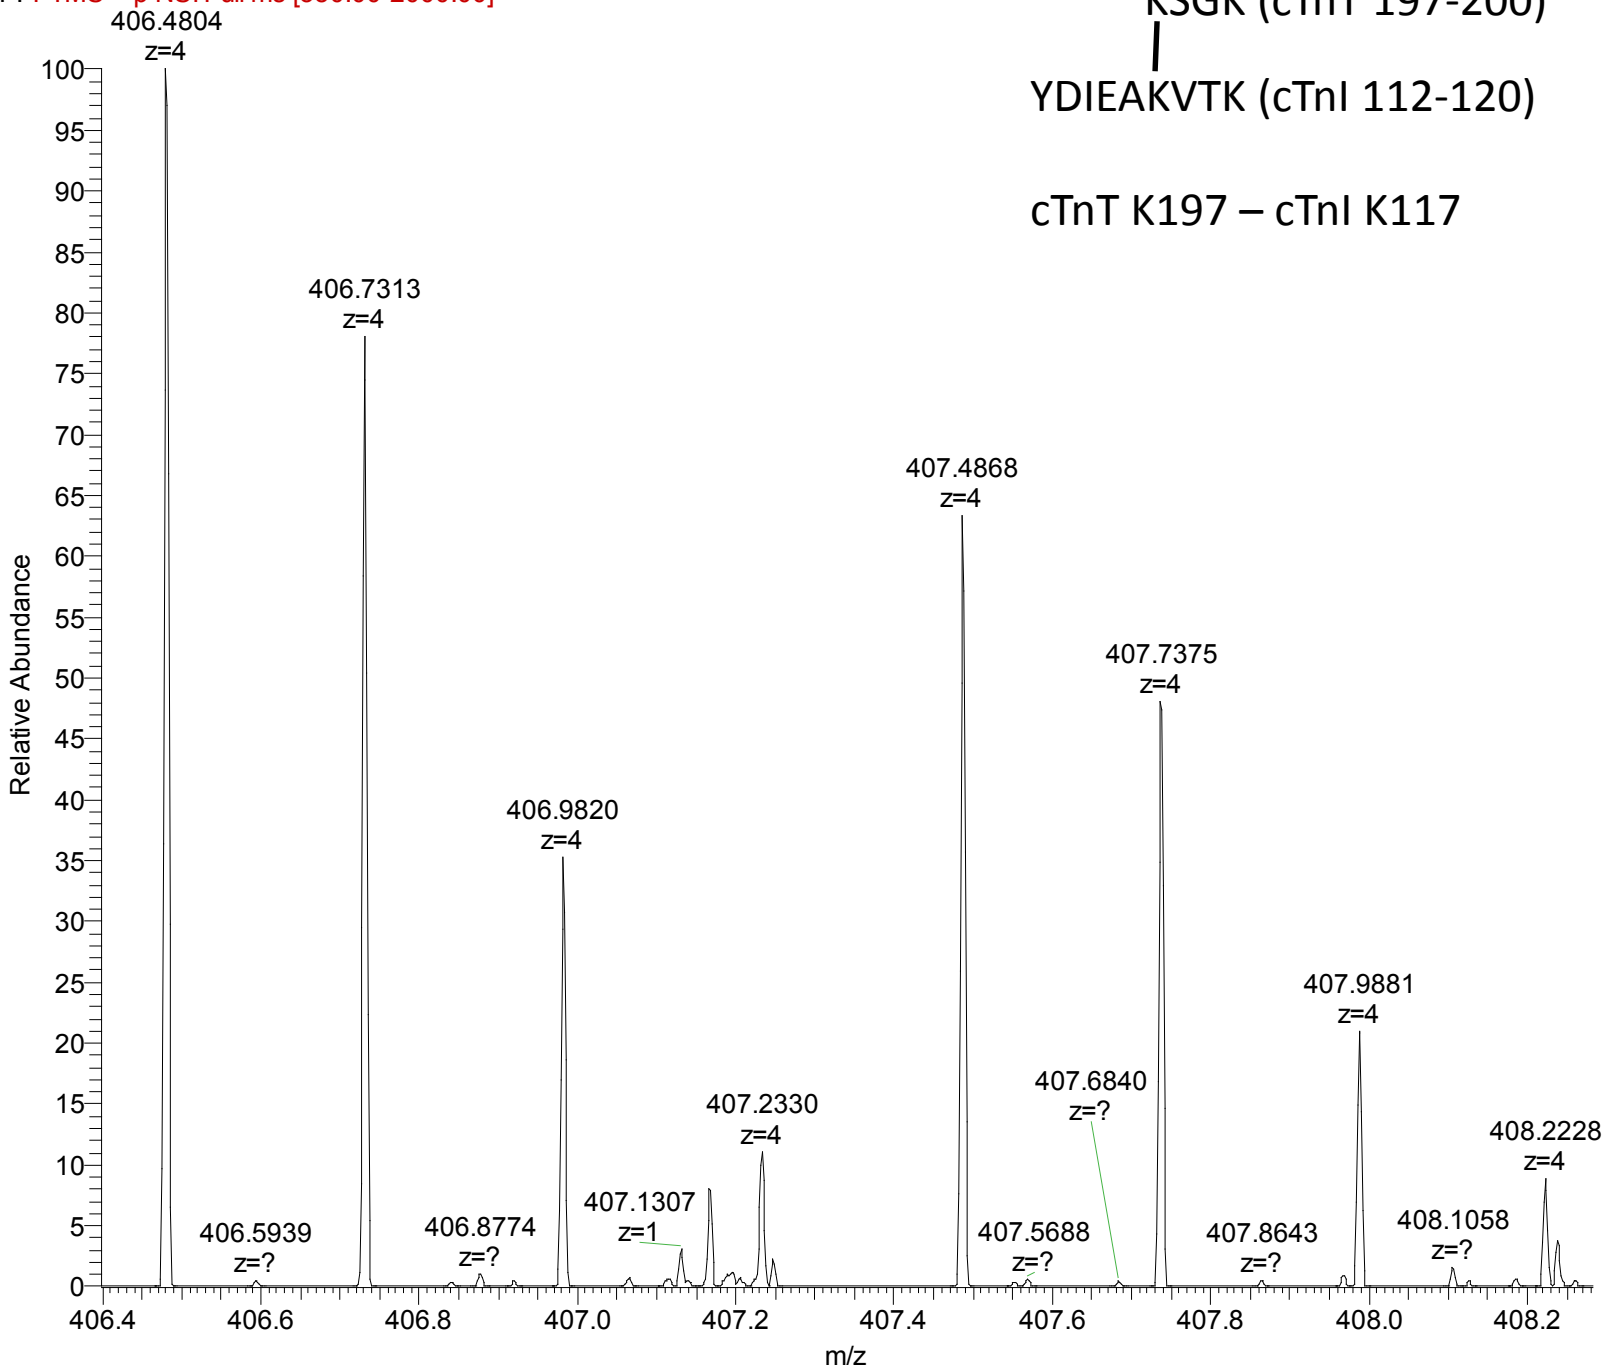

File: F:\Proje ... rad\_4uL\_1.mzXML\_9.zhrs  
 Scan: 7462  
 theor. Mass (M + H+): 1622.9  
 meas. Mass (M + H+): 1622.8975  
 Deviation -1.5 ppm  
 m/z: 406.479827880859  
 Charge: +4

Peptide  $\beta$ : [KSGK] (K1)  
 ( $\rightarrow$ sp|P453.. from 197 to 200)  
 Peptide  $\alpha$ : [YDIEAKVTK] (K6)  
 ( $\rightarrow$ sp|P194.. from 112 to 120)  
 Crosslinker: DSS/BS3

Score (102)  
 identified signals (0.003)  
 ion series (0.002)  
 intensity Ratio (0.005)  
 hits/possible ions (0.0)

KSGK (cTnT 197-200)  
 |  
 YDIEAKVTK (cTnI 112-120)

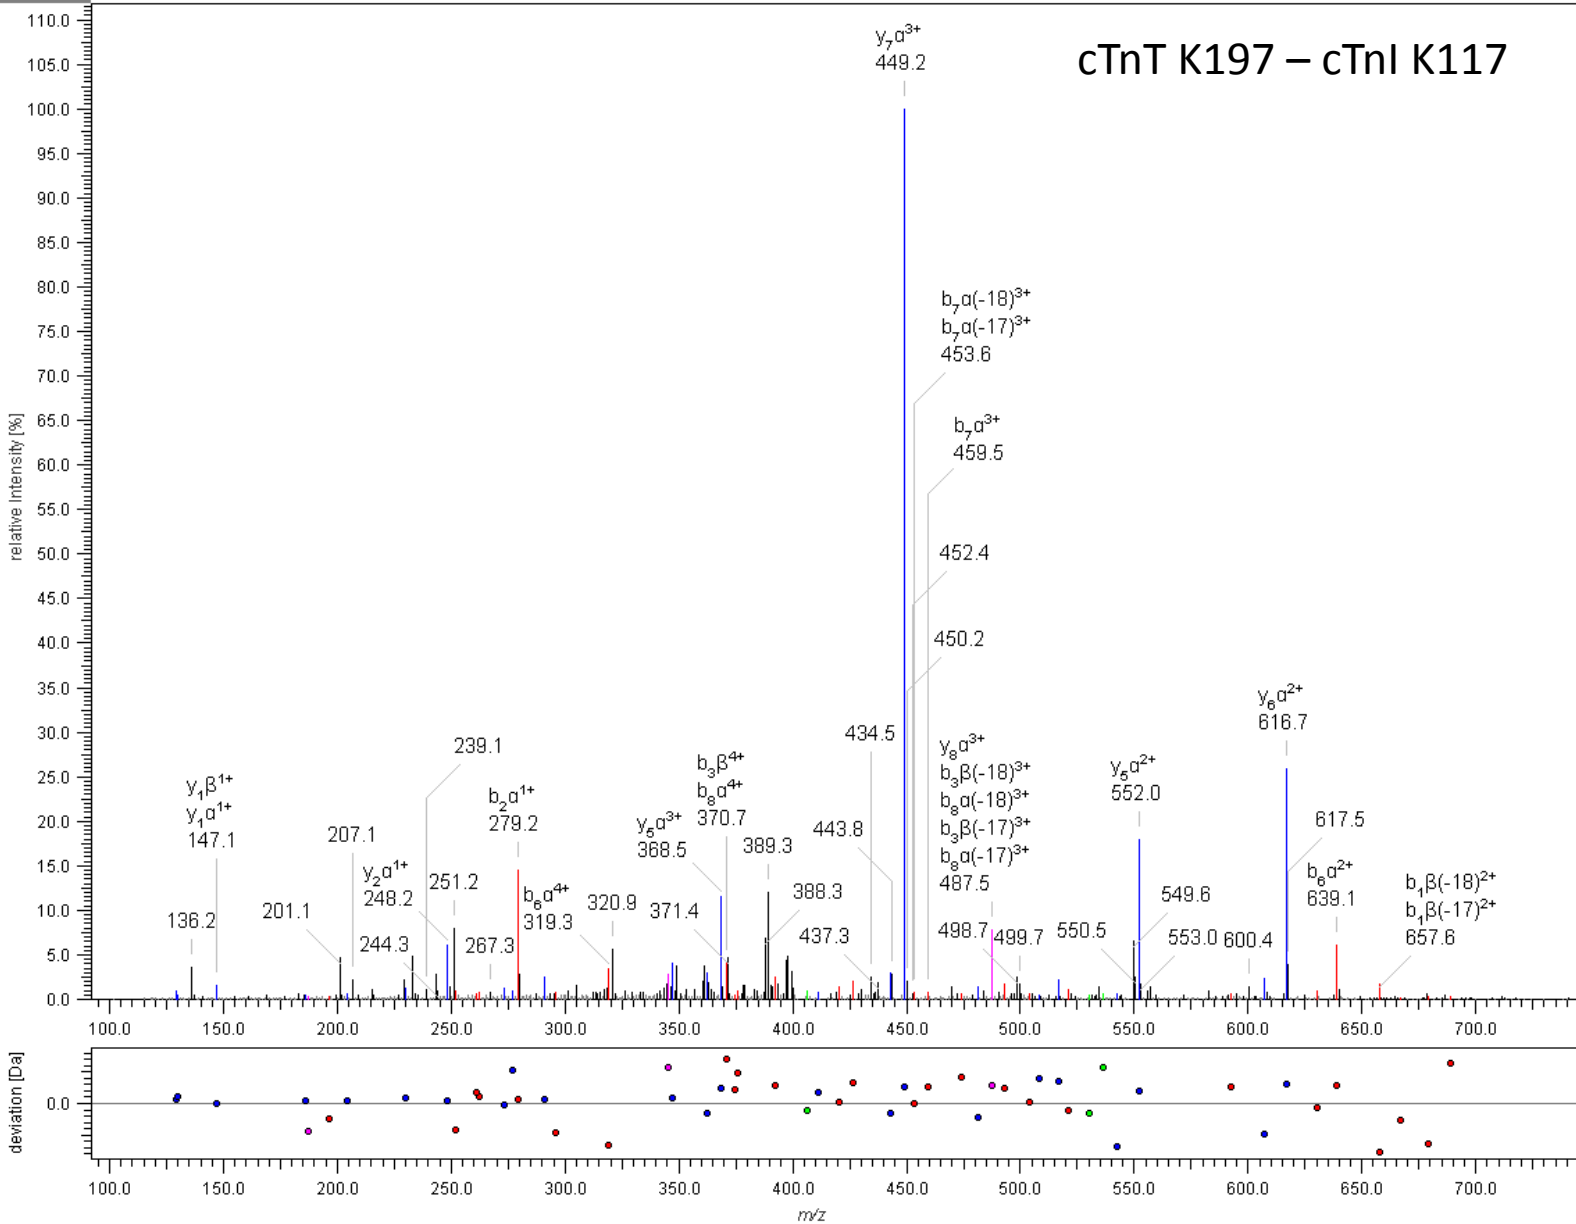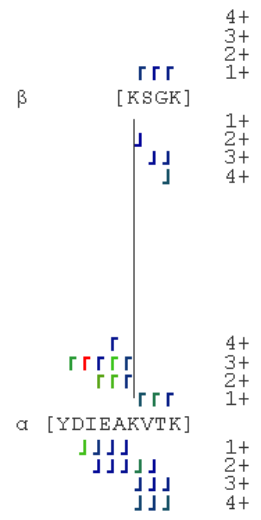

0% rel. intensity 100%

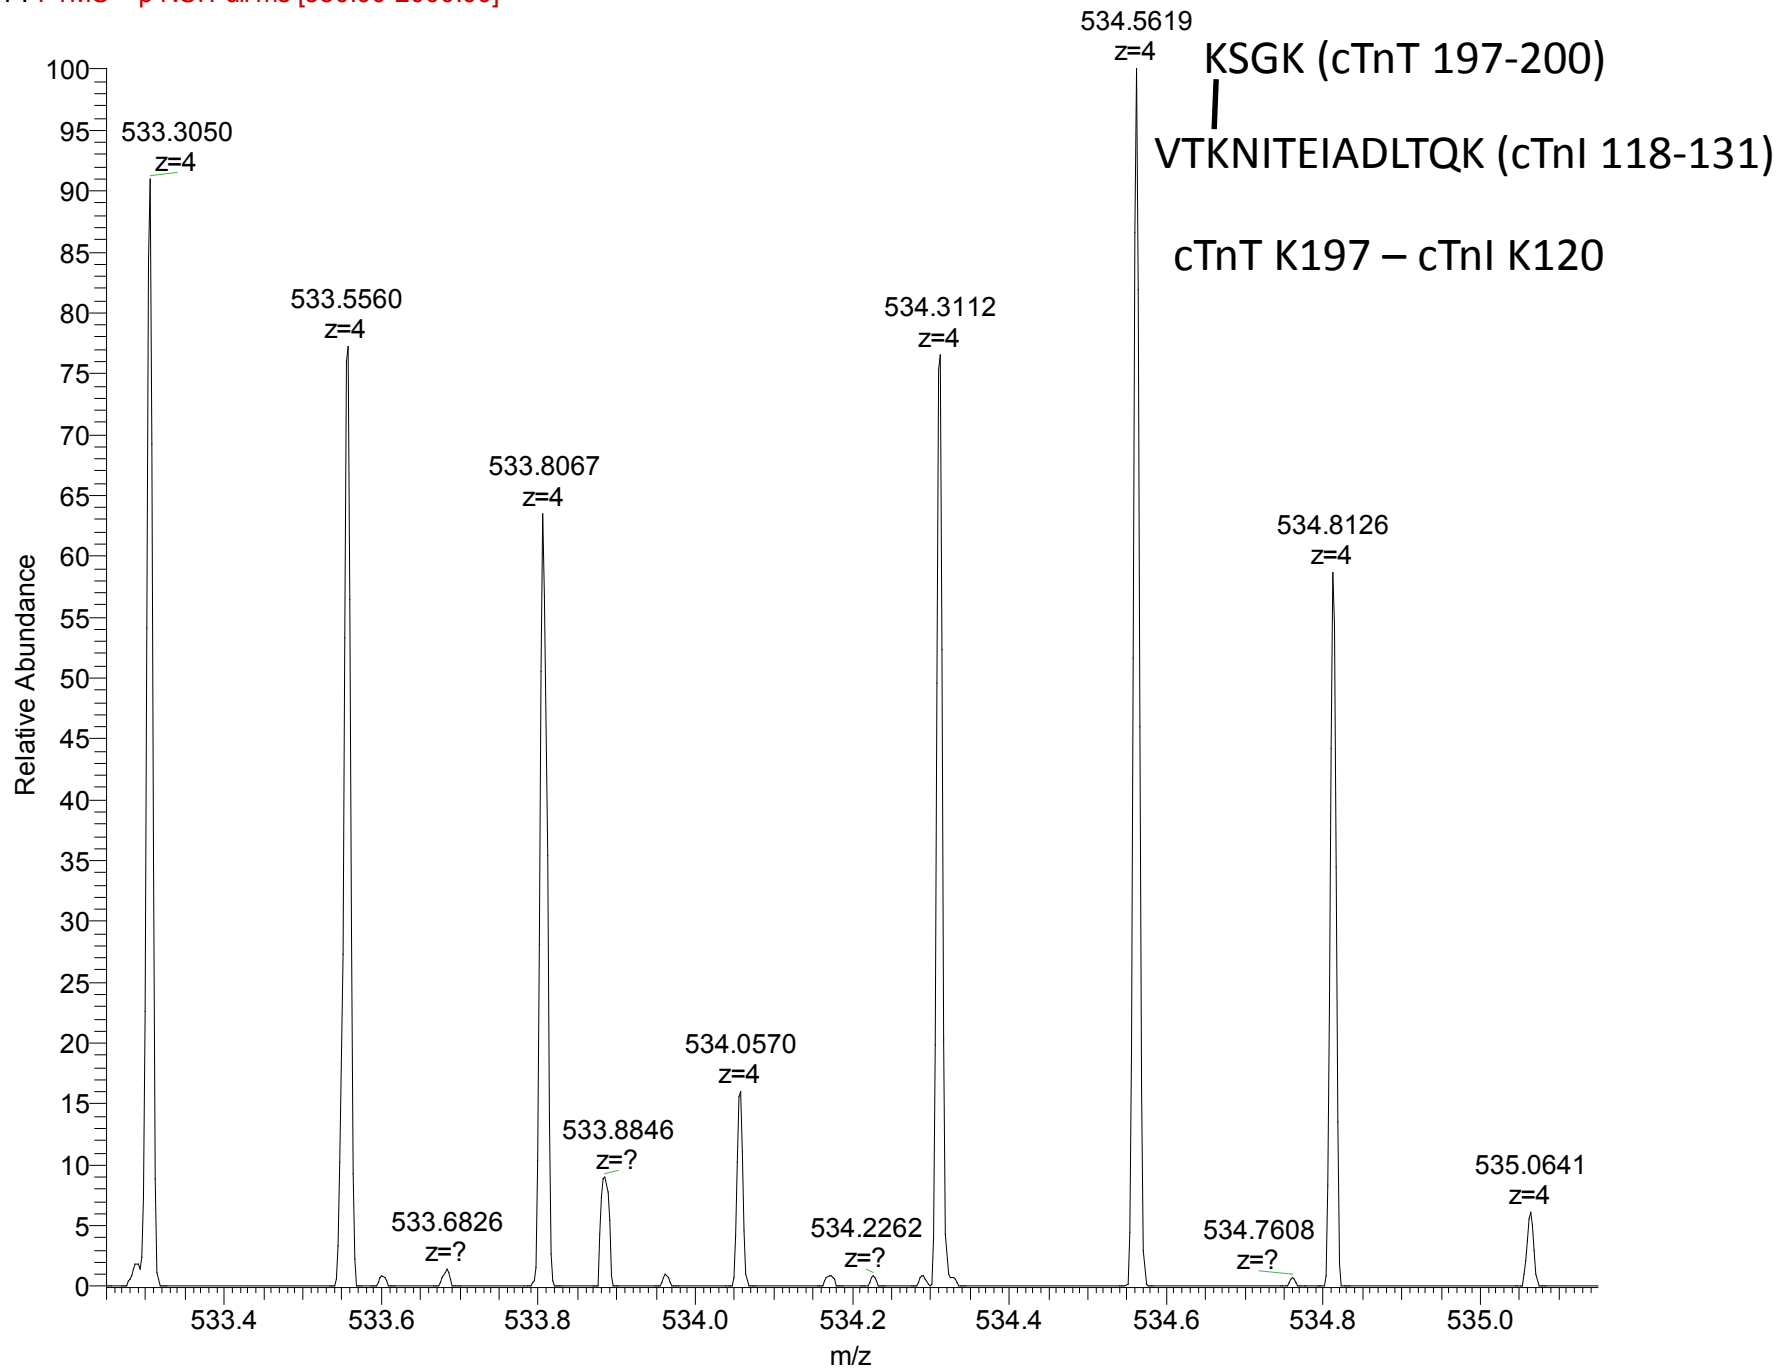

File: F:\Proje ... rad\_4uL\_1.mzXML\_5.zhrs  
 Scan: 10339  
 theor. Mass (M + H<sup>+</sup>): 2130.2016  
 meas. Mass (M + H<sup>+</sup>): 2130.203  
 Deviation 0.7 ppm  
 m/z: 533.306213378906  
 Charge: +4

Peptide β: [KSGK] (K1)  
 (>sp)P453.. from 197 to 200)  
 Peptide α: [VTKNITEIADLTQK] (K3)  
 (>sp)P194.. from 118 to 131)  
 Crosslinker: DSS/BS3

Score (145)  
 identified signals (0.0)  
 ion series (0.0)  
 intensity Ratio (0.001)  
 hits/possible ions (0.0)

**KSGK (cTnT 197-200)**  
**VTKNITEIADLTQK (cTnI 118-131)**

**cTnT K197 – cTnI K120**

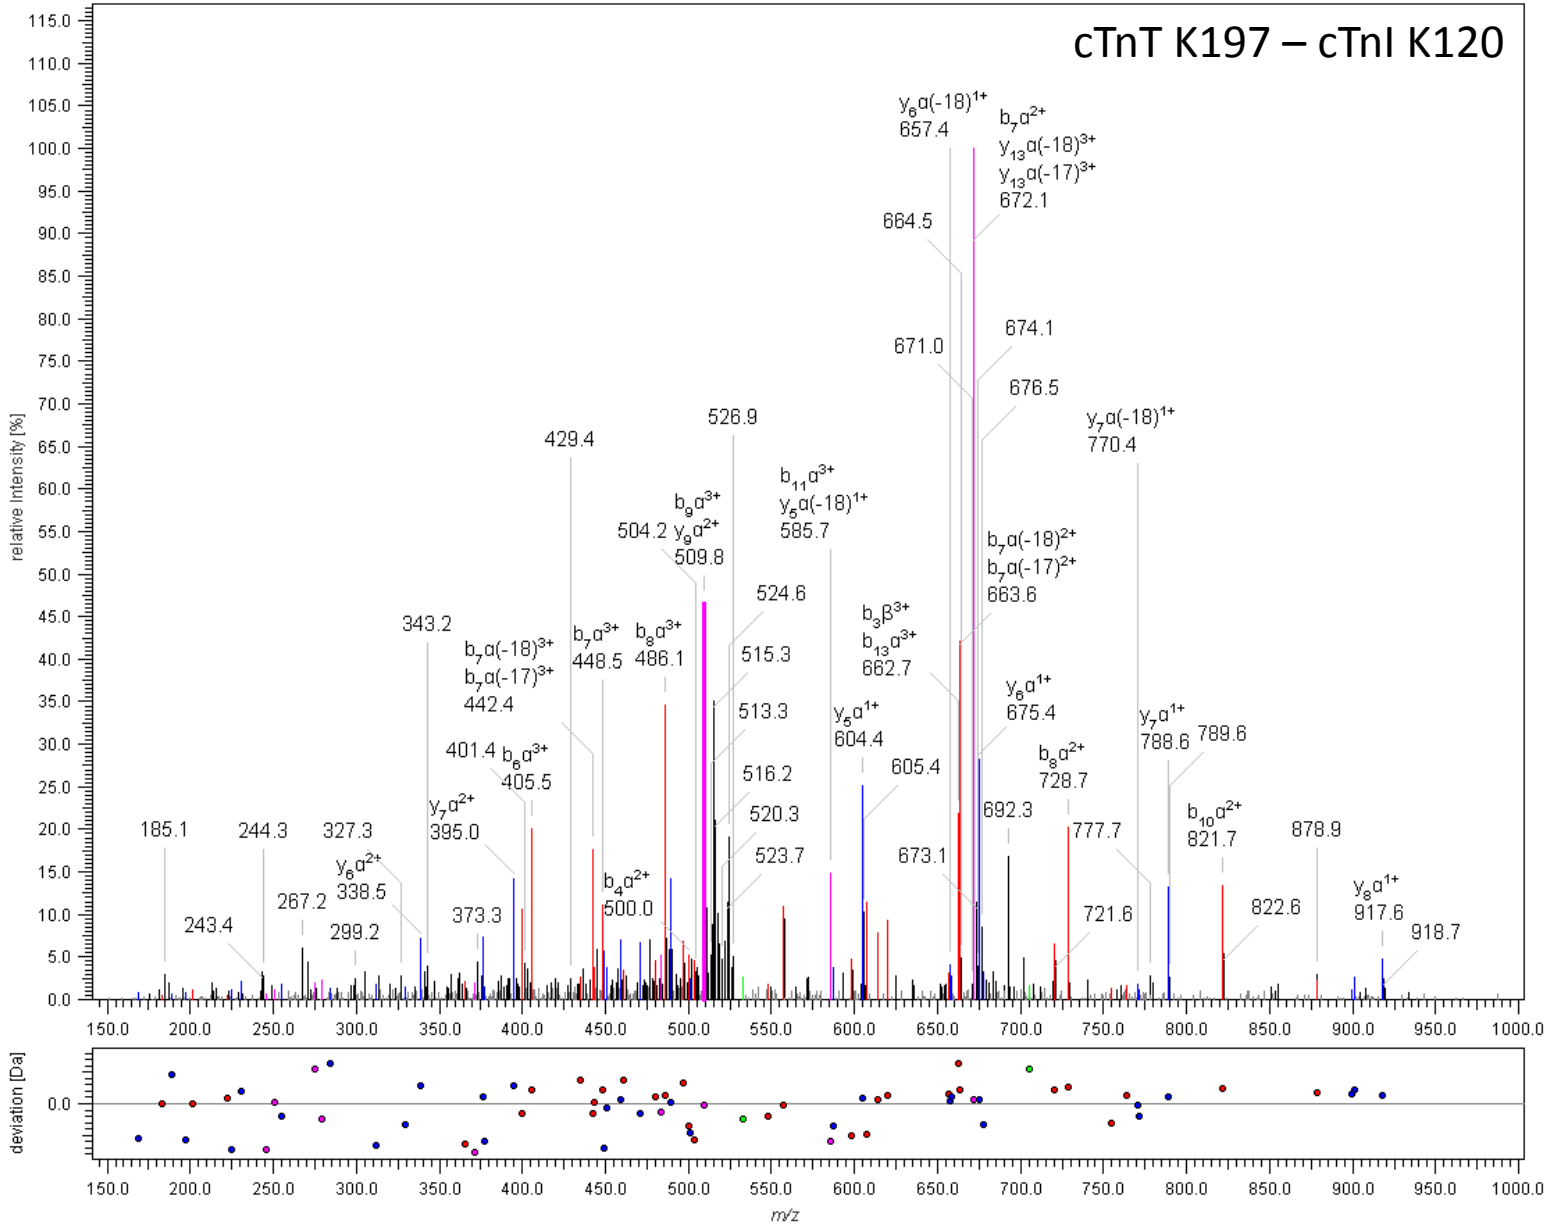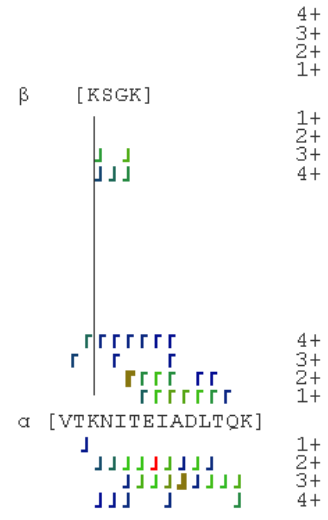

0% rel. intensity 100%

KSGK (cTnT 197-200)

VTKNITEIADLTQK (cTnI 118-131)

cTnT K197 – cTnI K120

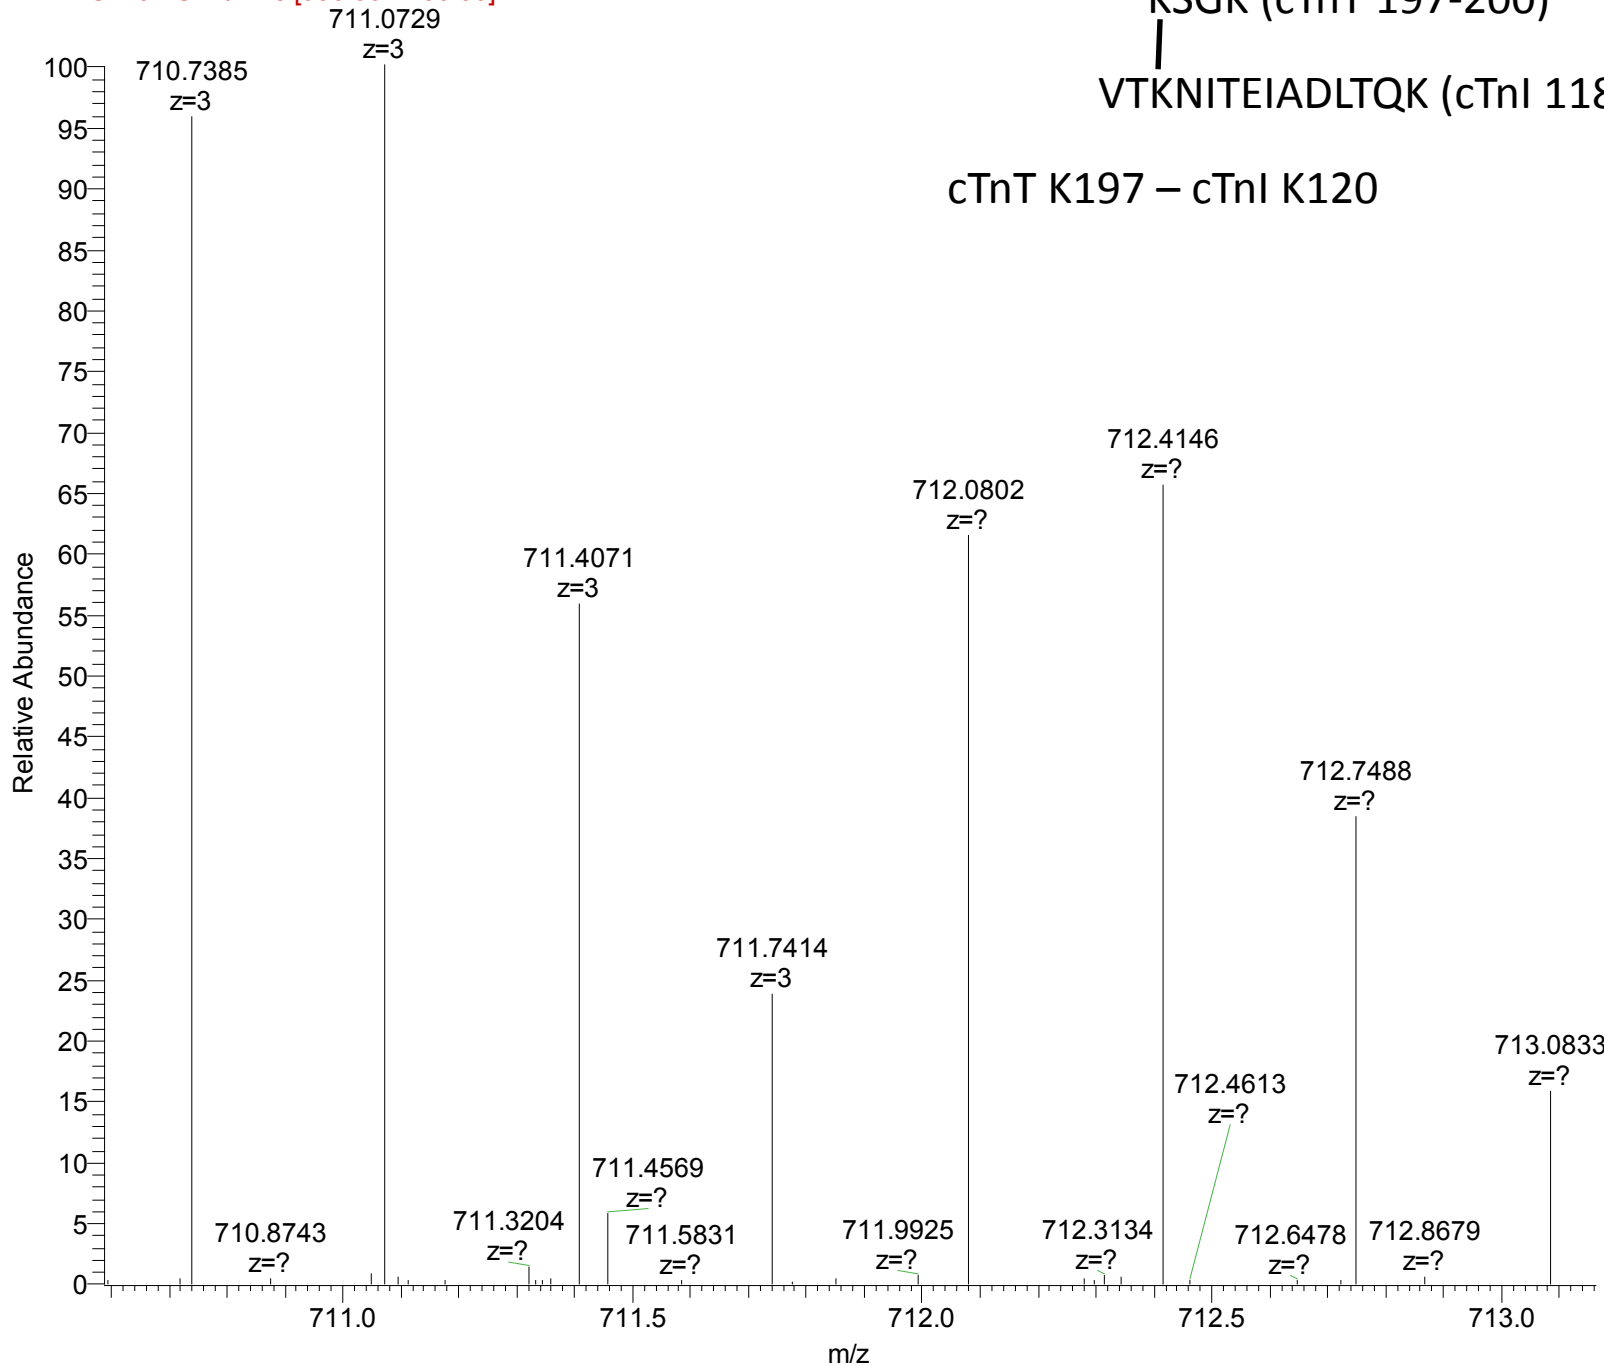

File: F:\Proje ... rad\_5uL\_1.mzXML\_1.zhrs  
 Scan: 16009  
 theor. Mass (M + H<sup>+</sup>): 2130.2016  
 meas. Mass (M + H<sup>+</sup>): 2130.2018  
 Deviation 0.1 ppm  
 m/z: 710.73876953125  
 Charge: +3

Peptide  $\beta$ : [KSGK] (K1)  
 (>sp)P453.. from 197 to 200)  
 Peptide  $\alpha$ : [VTKNITEIADLTQK] (K3)  
 (>sp)P194.. from 118 to 131)  
 Crosslinker: DSS/BS3

Score (111)  
 identified signals (0.007)  
 ion series (0.002)  
 intensity Ratio (0.001)  
 hits/possible ions (0.0)

KSGK (cTnT 197-200)  
 |  
 VTKNITEIADLTQK (cTnI 118-131)

## cTnT K197 – cTnI K120

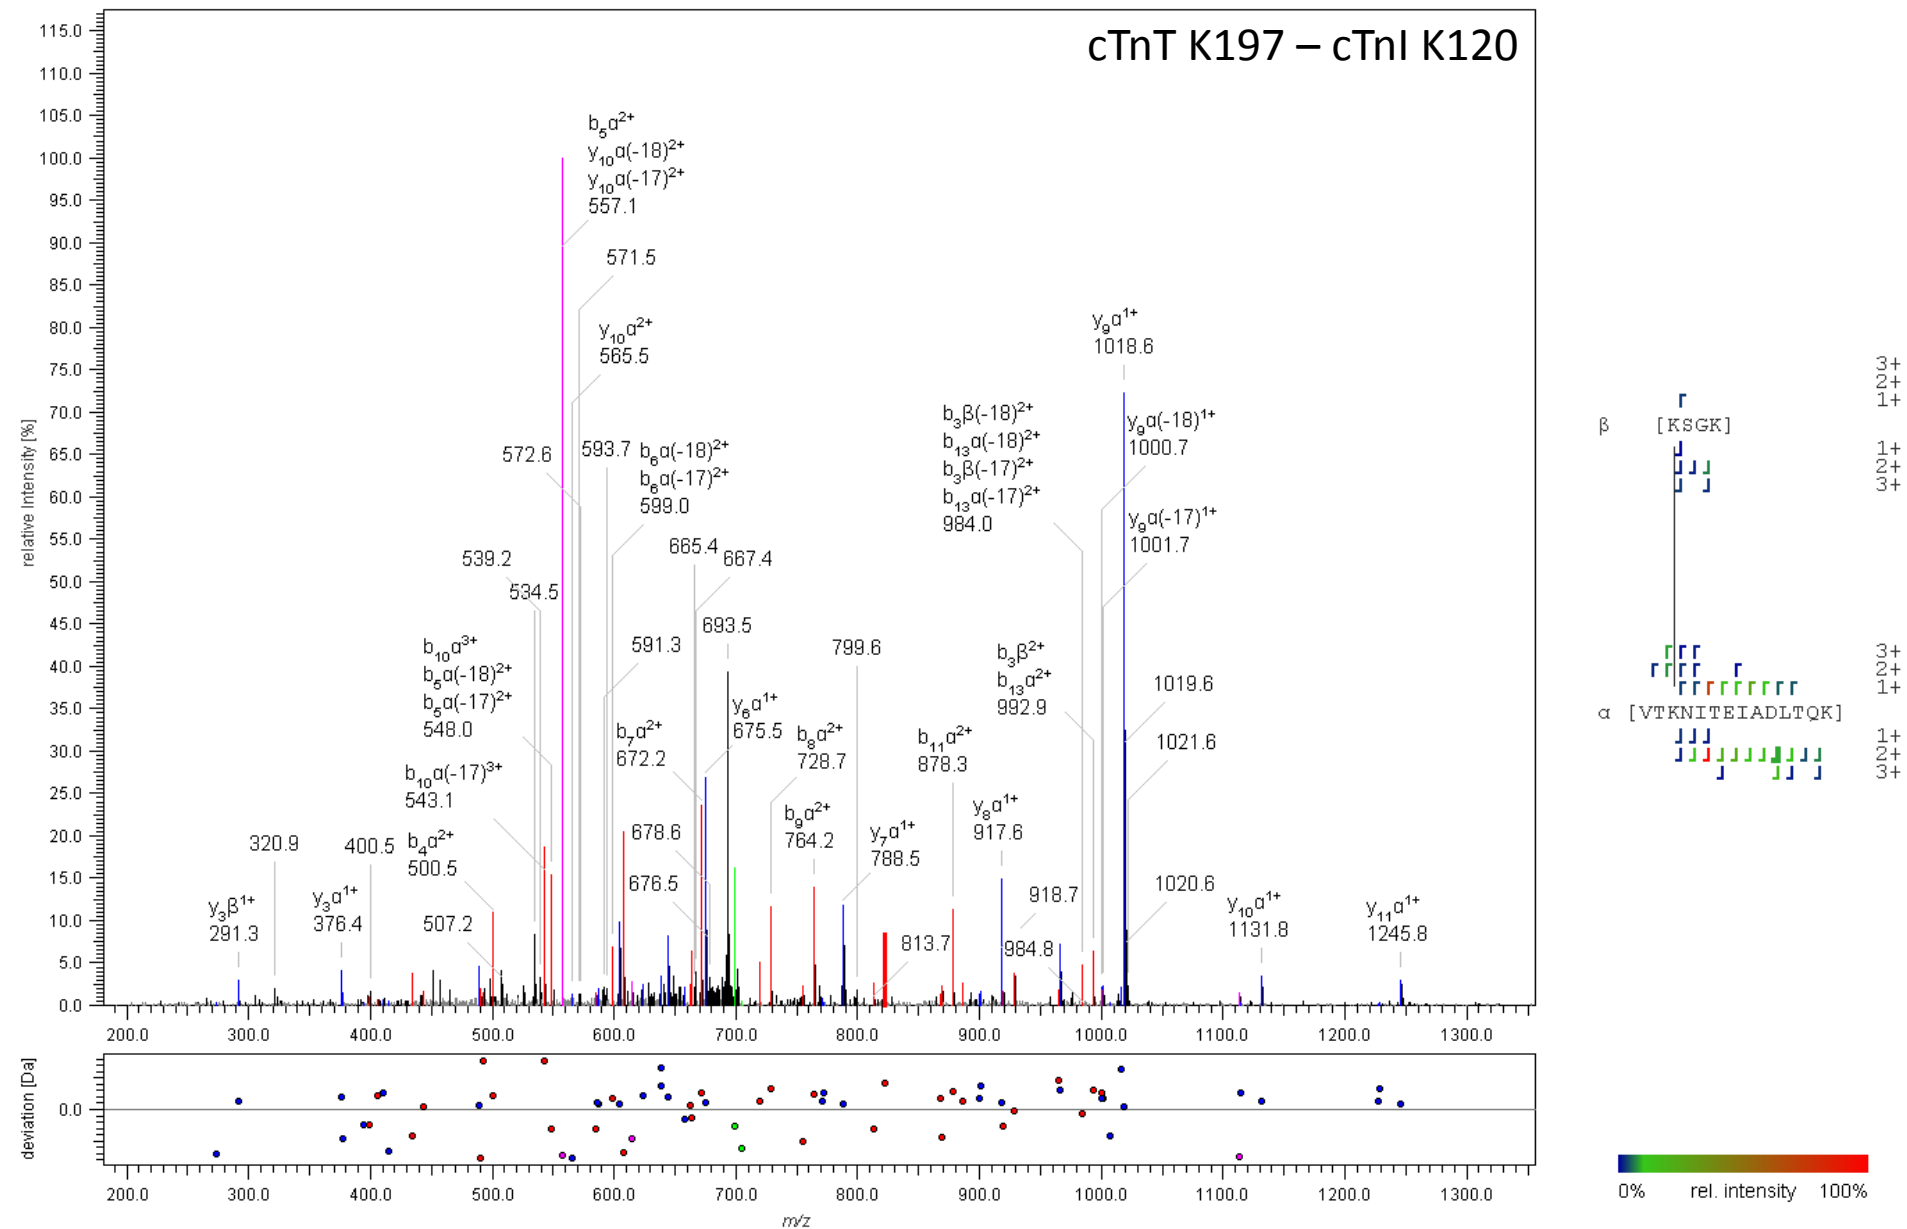

SGKR (cTnT 198-201)

YDIEAKVTK (cTnI 112-120)

cTnT K200 – cTnI K117

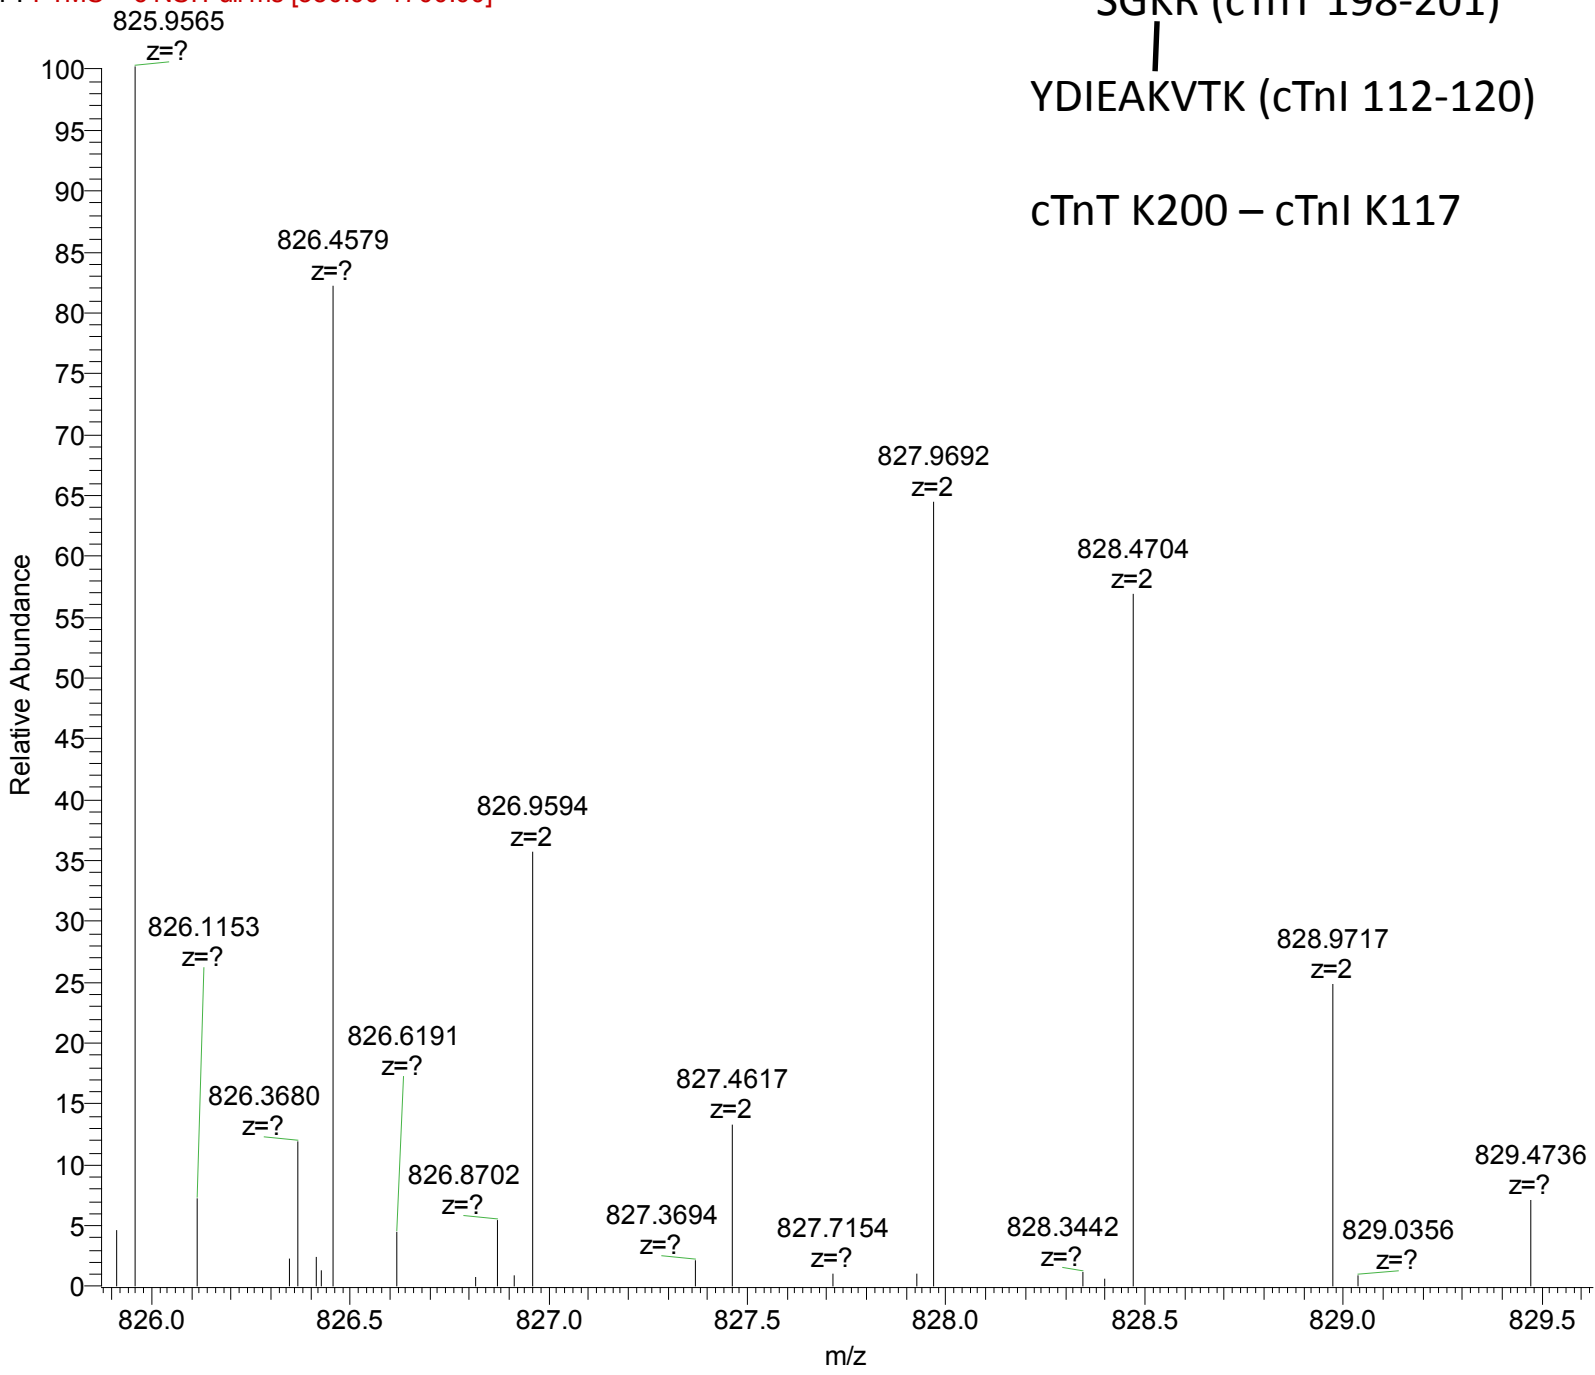

File: F:\Proje ... rad\_5uL\_1.mzXML\_9.zhrs  
 Scan: 11933  
 theor. Mass (M + H+): 1650.9061  
 meas. Mass (M + H+): 1650.9083  
 Deviation 1.3 ppm  
 m/z: 825.957763671875  
 Charge: +2

Peptide  $\beta$ : [SGKR] (K3)  
 (>sp)P453.. from 198 to 201  
 Peptide  $\alpha$ : [YDIEAKVTK] (K6)  
 (>sp)P194.. from 112 to 120  
 Crosslinker: DSS/BS3

Score (112)  
 identified signals (0.013)  
 ion series (0.006)  
 intensity Ratio (0.002)  
 hits/possible ions (0.0)

SGKR (cTnT 198-201)  
 |  
 YDIEAKVTK (cTnI 112-120)

cTnT K200 – cTnI K117

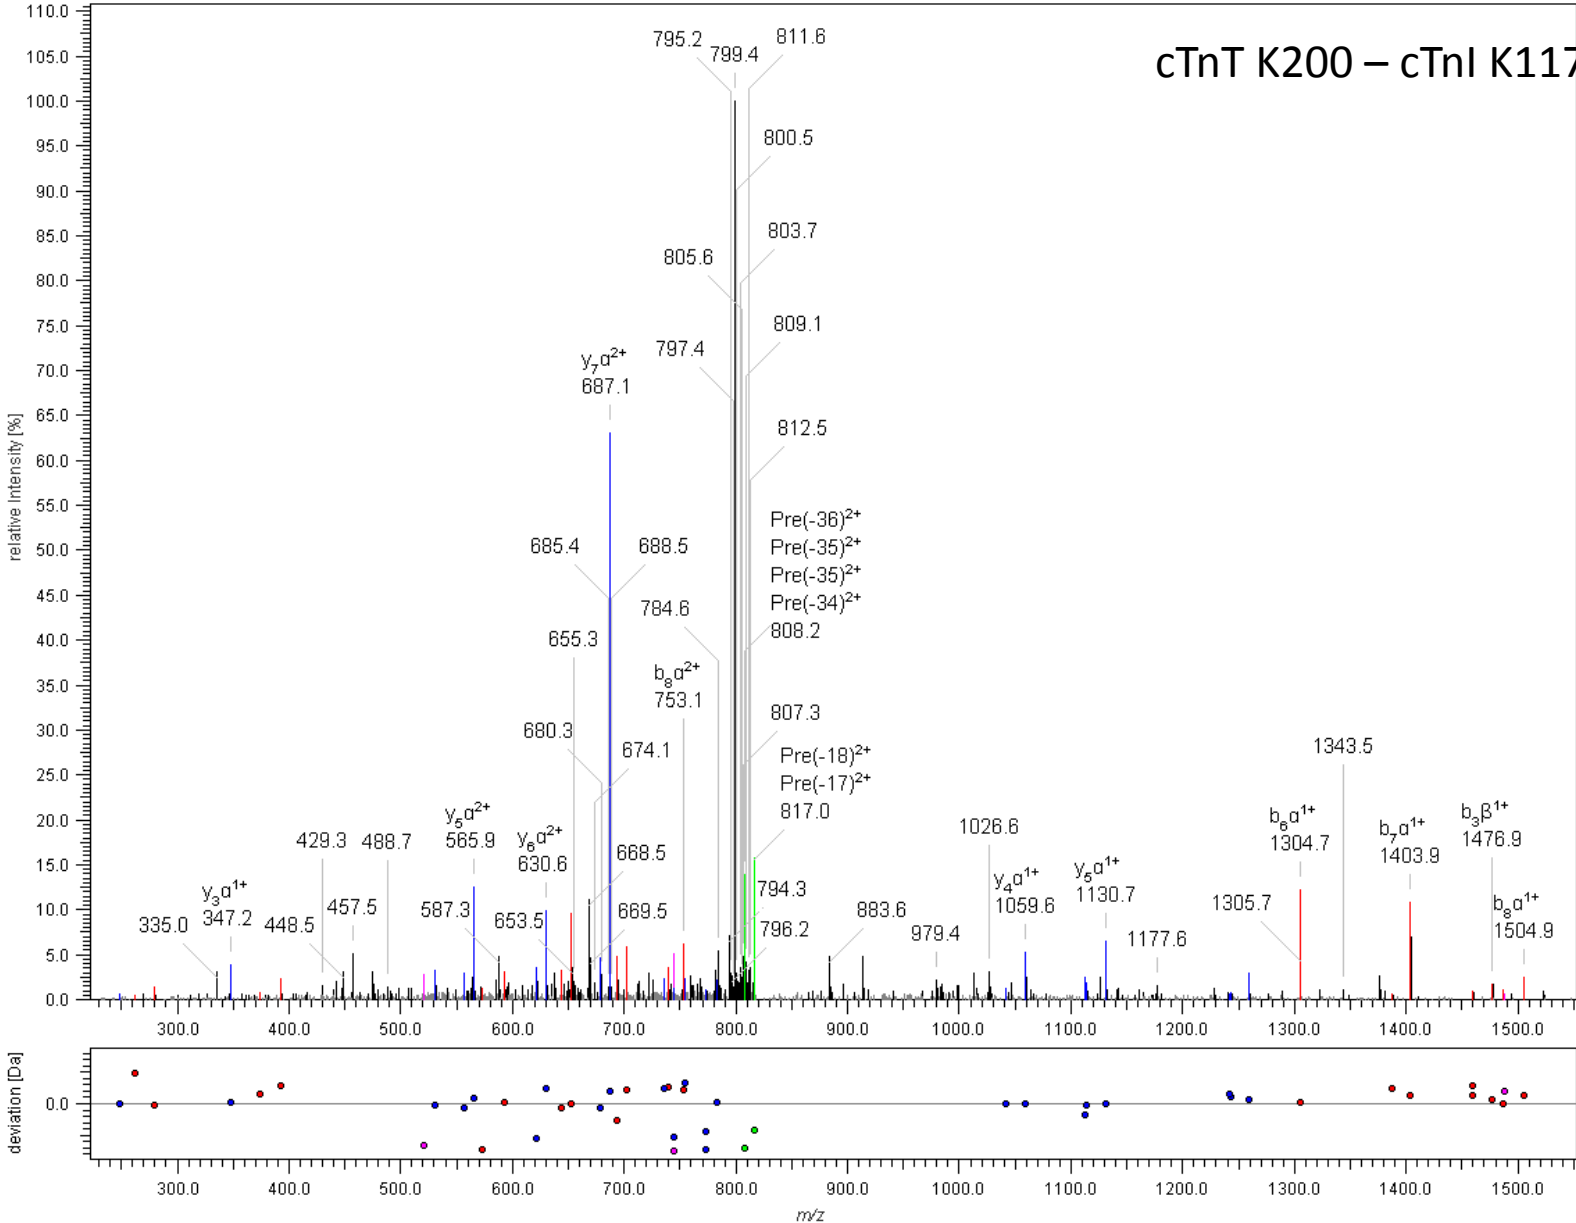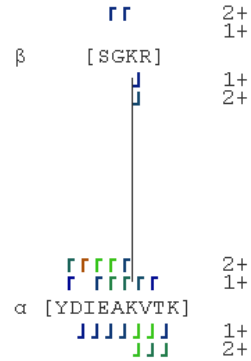



KSGK (cTnT 197-200)

YDIEAKVTK (cTnI 112-120)

cTnT K200 – cTnI K117

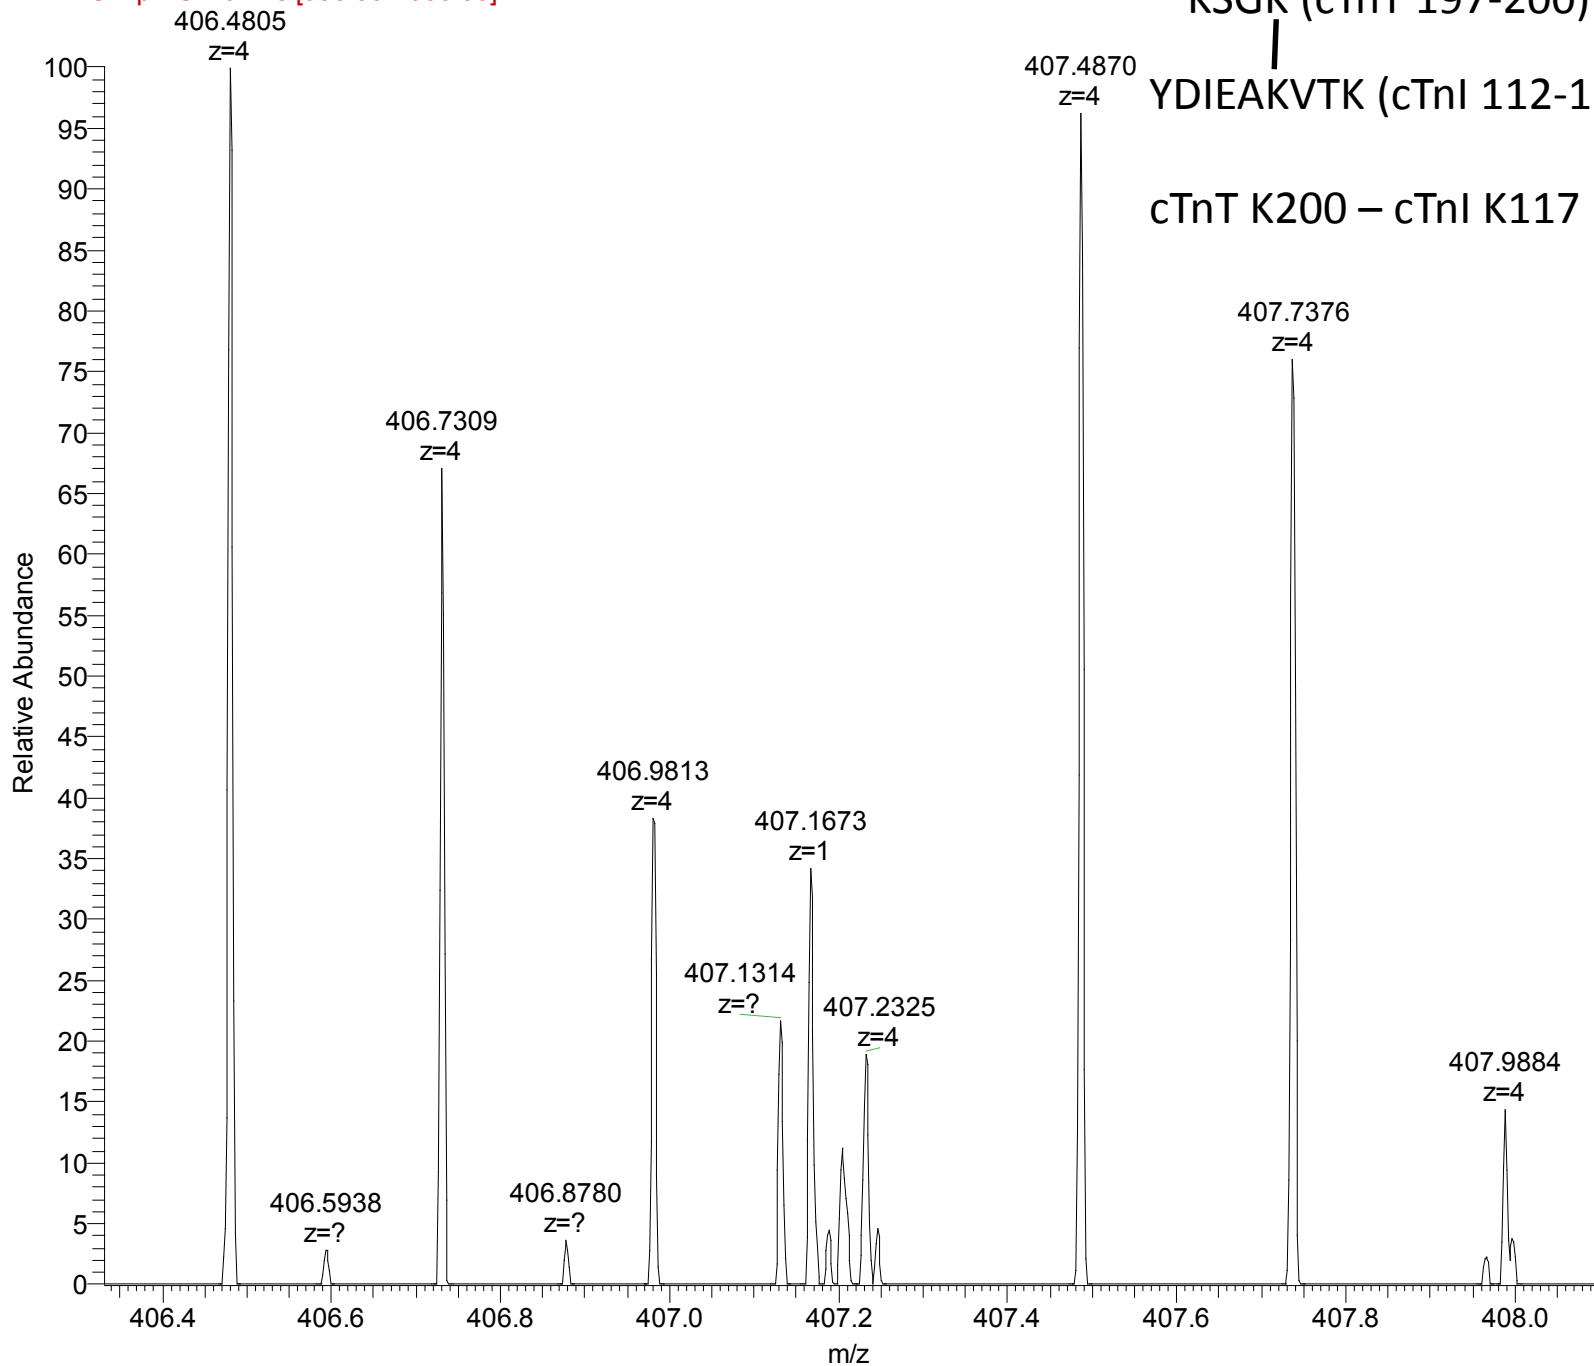

File: F:\Proje ... rad\_4uL\_1.mzXML\_6.zhrs  
 Scan: 6212  
 theor. Mass (M + H+): 1622.9  
 meas. Mass (M + H+): 1622.9011  
 Deviation 0.7 ppm  
 m/z: 406.480743408203  
 Charge: +4

Peptide  $\beta$ : [KSGK] (K4)  
 (>sp)P453.. from 197 to 200  
 Peptide  $\alpha$ : [YDIEAKVTK] (K6)  
 (>sp)P194.. from 112 to 120  
 Crosslinker: DSS/BS3

Score (105)  
 identified signals (0.002)  
 ion series (0.0)  
 intensity Ratio (0.022)  
 hits/possible ions (0.001)

KSGK (cTnT 197-200)  
 |  
 YDIEAKVTK (cTnI 112-120)

cTnT K200 – cTnI K117

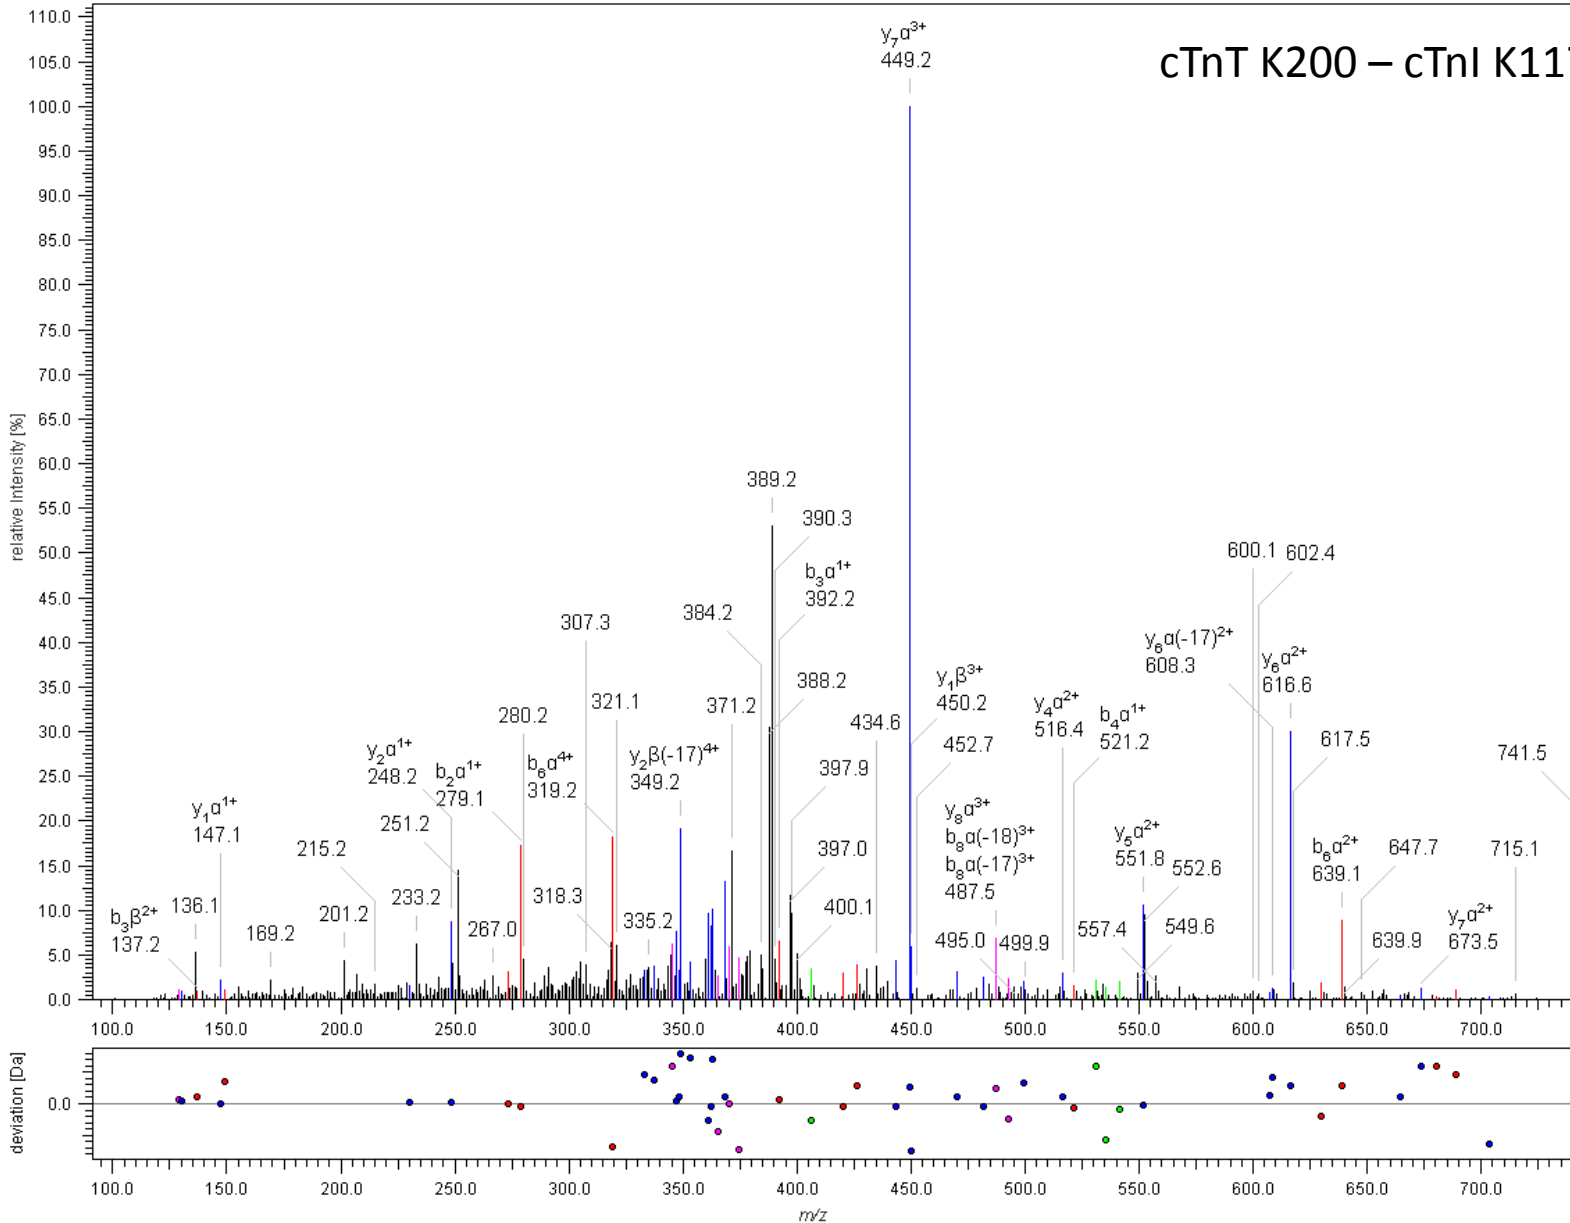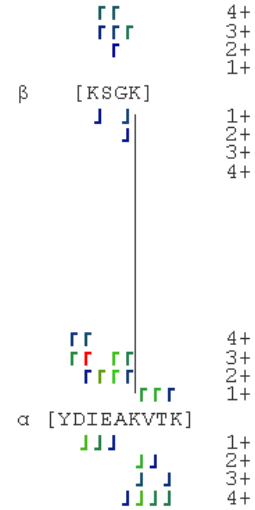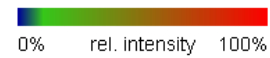

EKK (cTnT 206-208)

YDIEAKVTK (cTnI 112-120)

cTnT K207 – cTnI K117

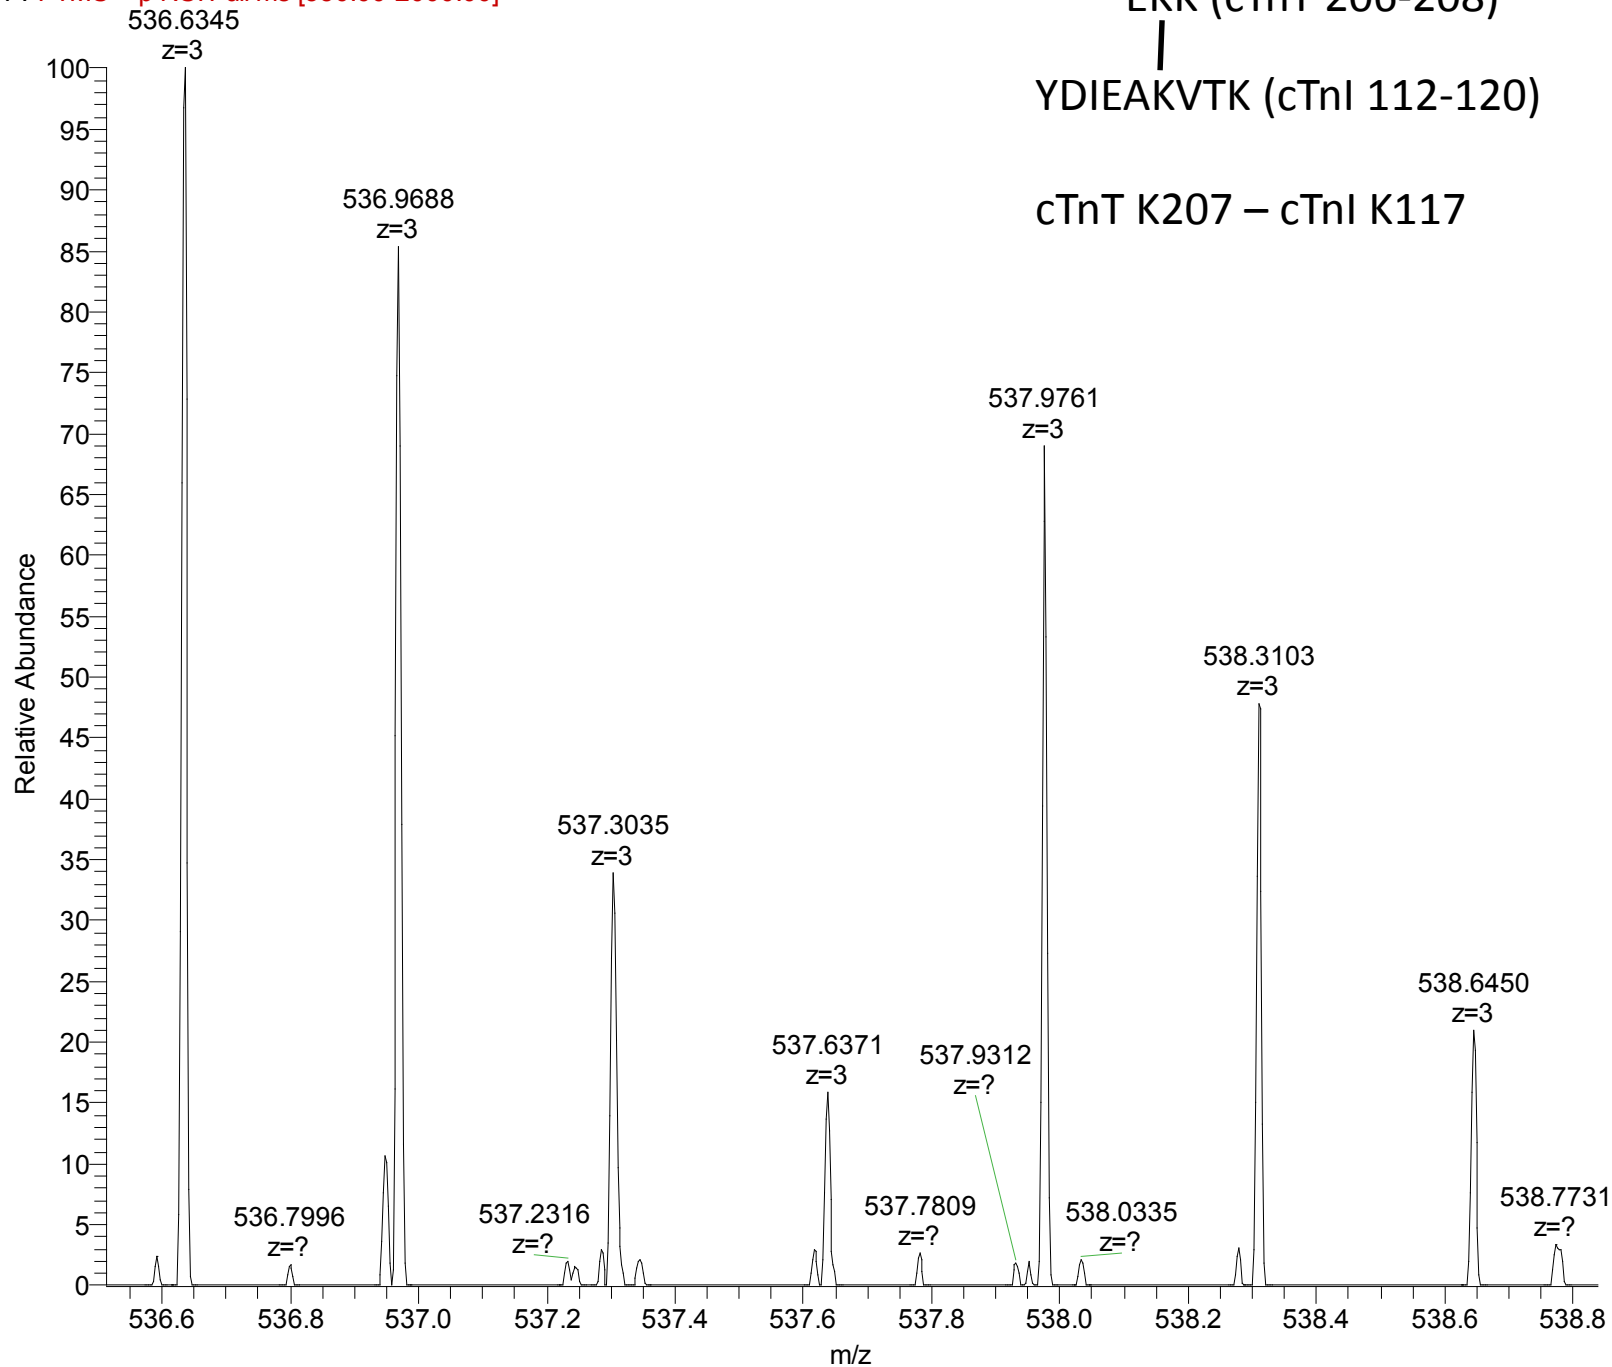

File: F:\Proje ... rad\_4uL\_1.mzXML\_0.zhrs  
 Scan: 7820  
 theor. Mass (M + H+): 1607.8891  
 meas. Mass (M + H+): 1607.8868  
 Deviation -1.4 ppm  
 m/z: 536.6337890625  
 Charge: +3

Peptide  $\beta$ : [EKK] (K2)  
 (>sp)P453.. from 206 to 208  
 Peptide  $\alpha$ : [YDIEAKVTK] (K6)  
 (>sp)P194.. from 112 to 120  
 Crosslinker: DSS/BSS

Score (73)  
 identified signals (0.019)  
 ion series (0.091)  
 intensity Ratio (0.001)  
 hits/possible ions (0.0)

EKK (cTnT 206-208)  
 |  
 YDIEAKVTK (cTnI 112-120)

cTnT K207 – cTnI K117

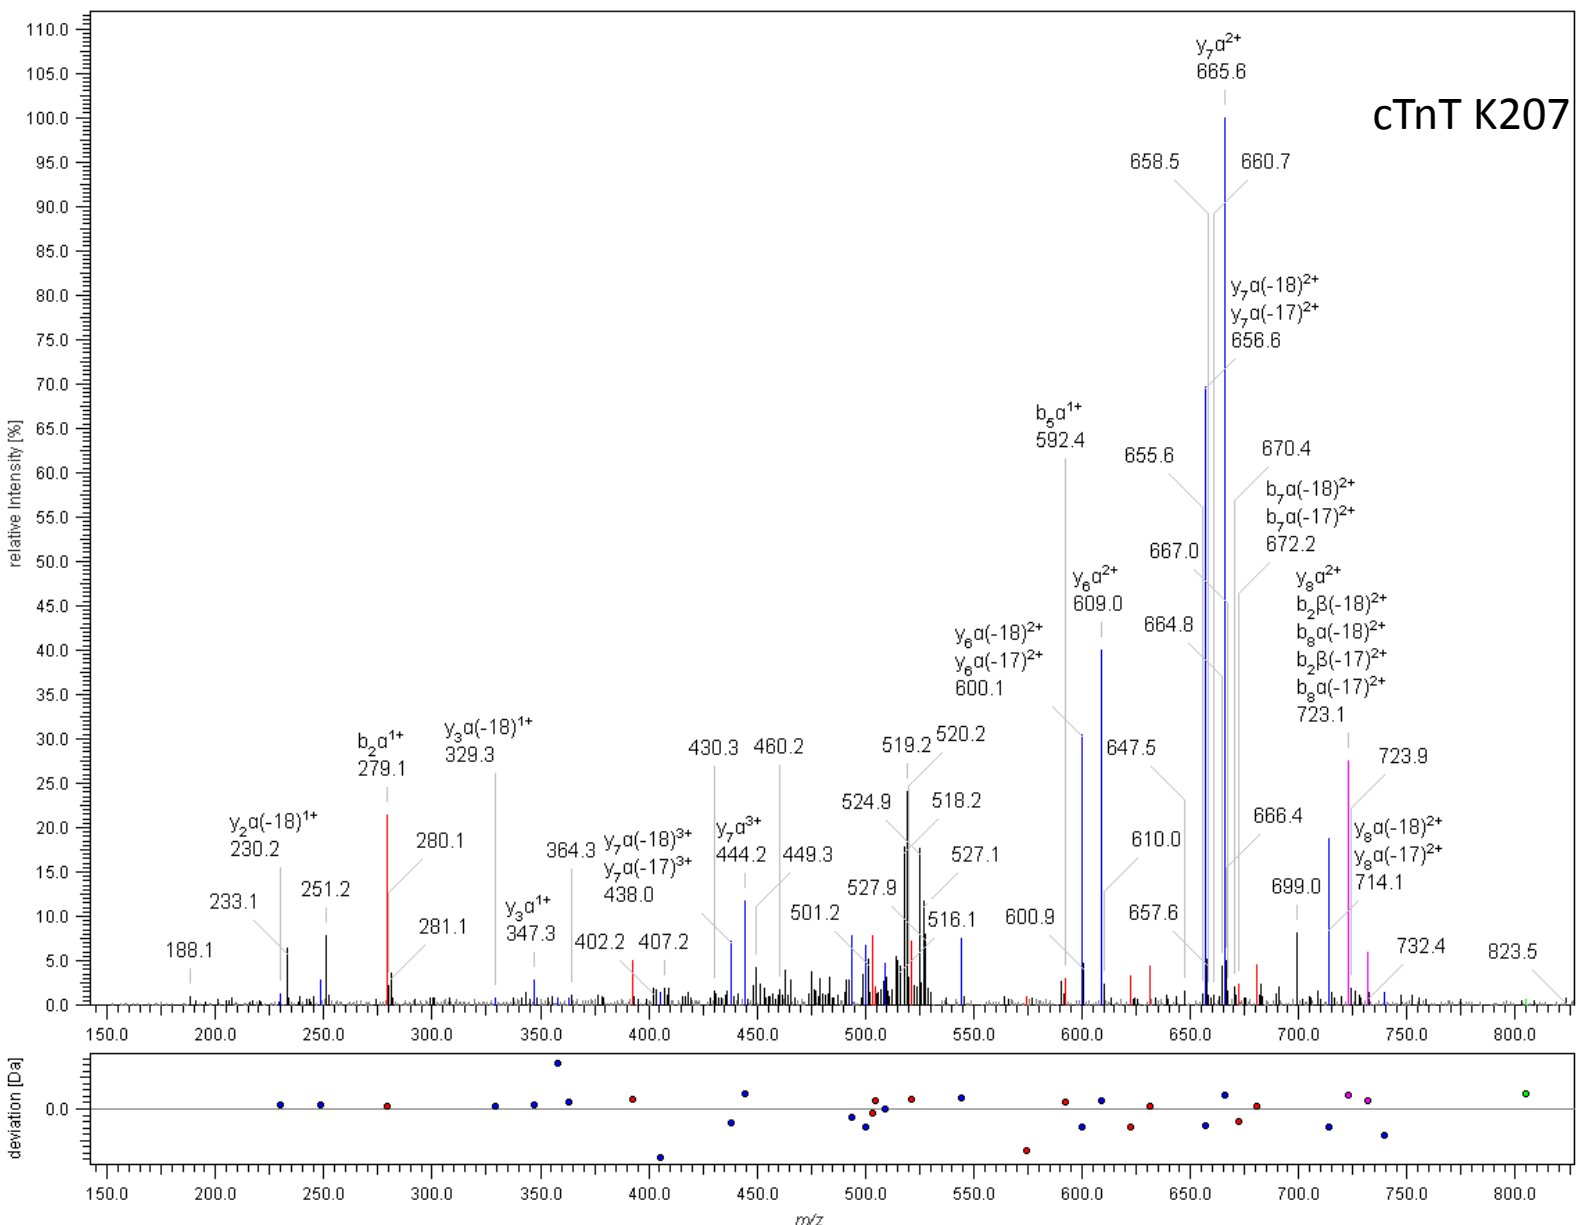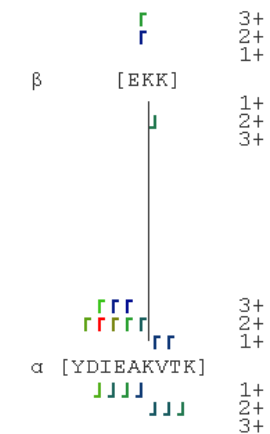

0% rel. intensity 100%

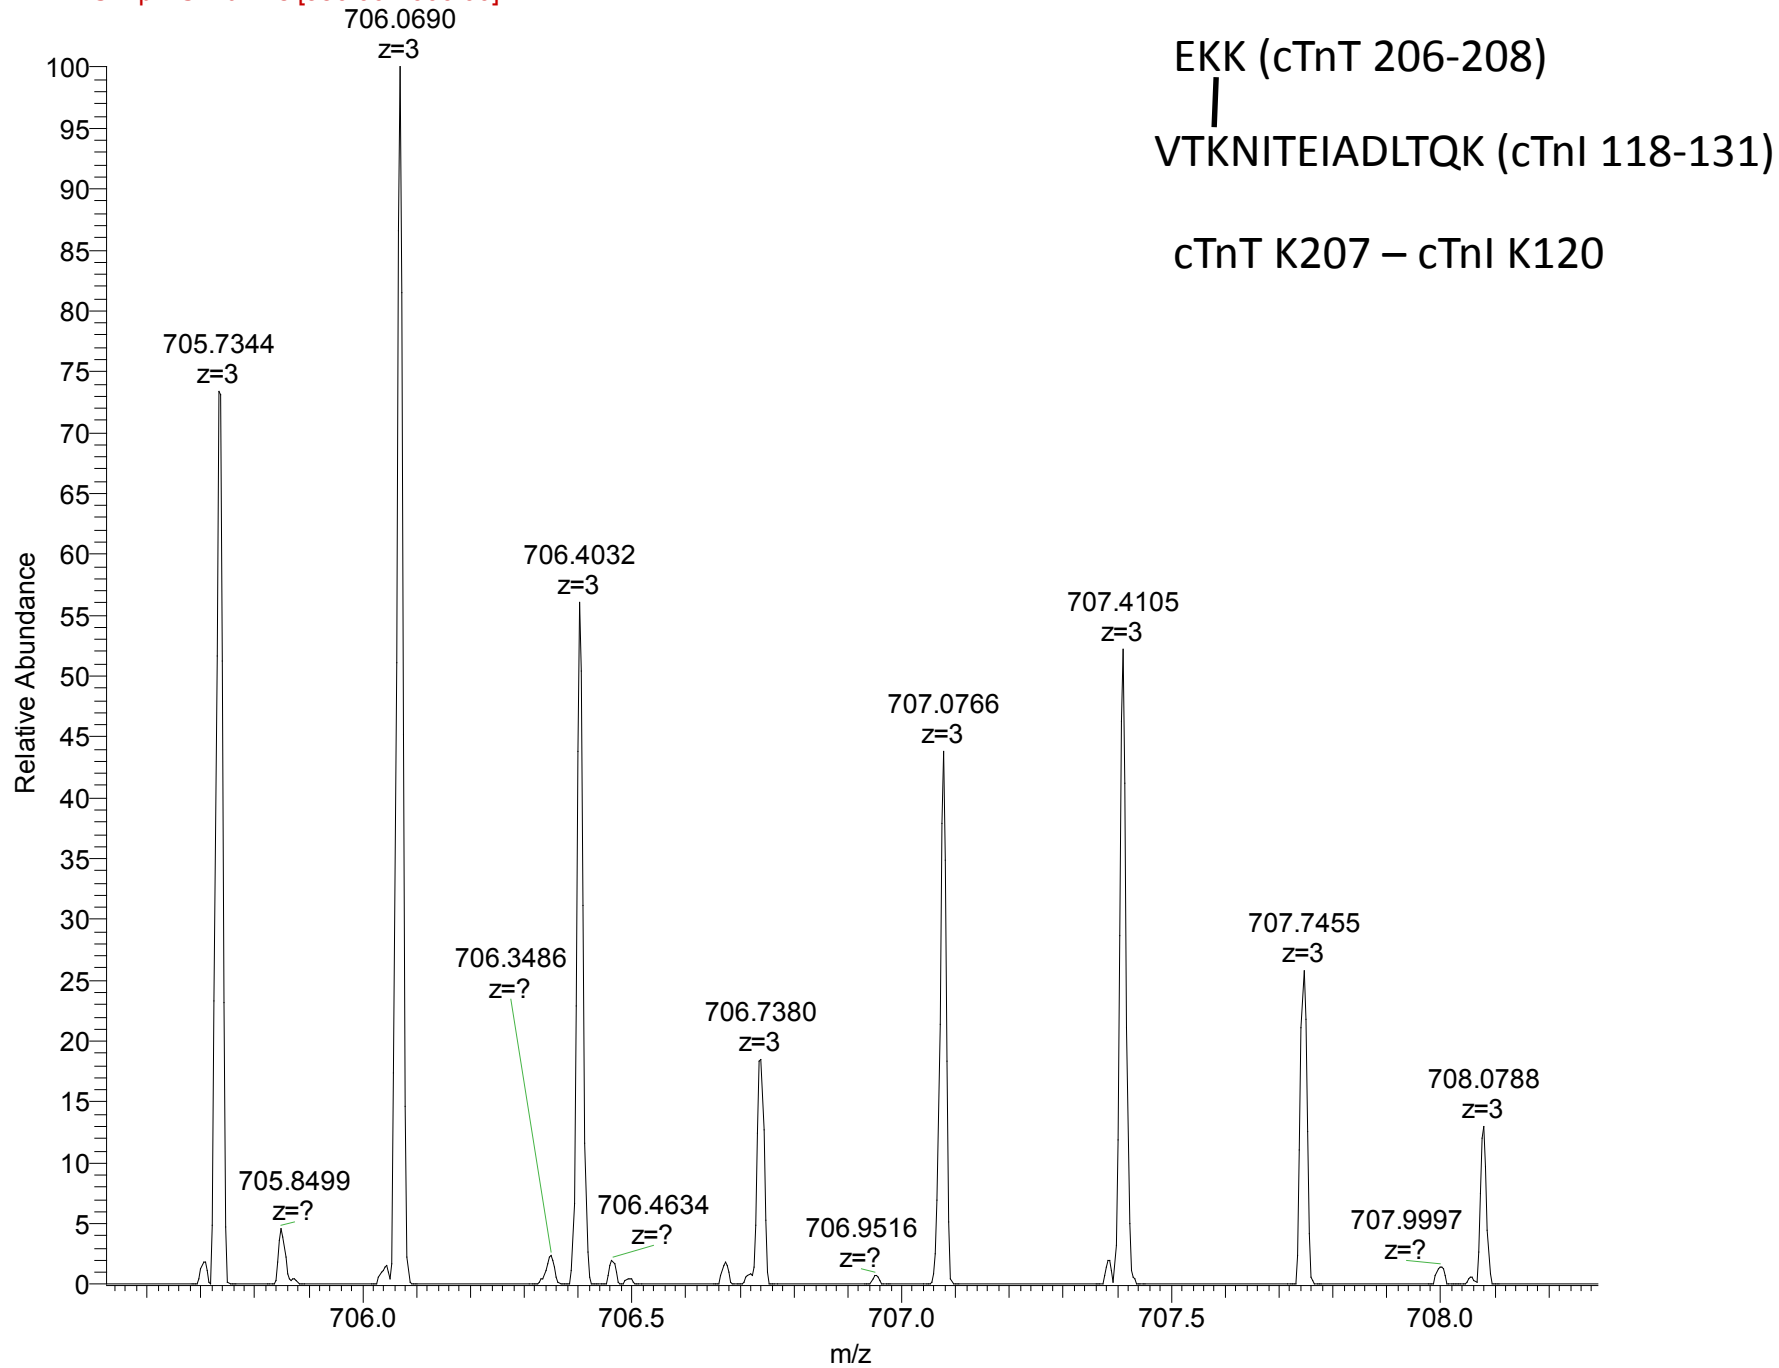

File: F:\Proje ... rad\_4uL\_1.mzXML\_3.zhrs  
 Scan: 10627  
 theor. Mass (M + H+): 2115.1907  
 meas. Mass (M + H+): 2115.1886  
 Deviation -1.0 ppm  
 m/z: 705.734375  
 Charge: +3

Peptide  $\beta$ : [EKK] (K2)  
 (>sp)P453.. from 206 to 208)  
 Peptide  $\alpha$ : [VTKNITEIADLTQK] (K3)  
 (>sp)P194.. from 118 to 131)  
 Crosslinker: DSS/BBS3

Score (106)  
 identified signals (0.002)  
 ion series (0.091)  
 intensity Ratio (0.001)  
 hits/possible ions (0.0)

EKK (cTnT 206-208)  
 |  
 VTKNITEIADLTQK (cTnI 118-131)  
 cTnT K207 – cTnI K120

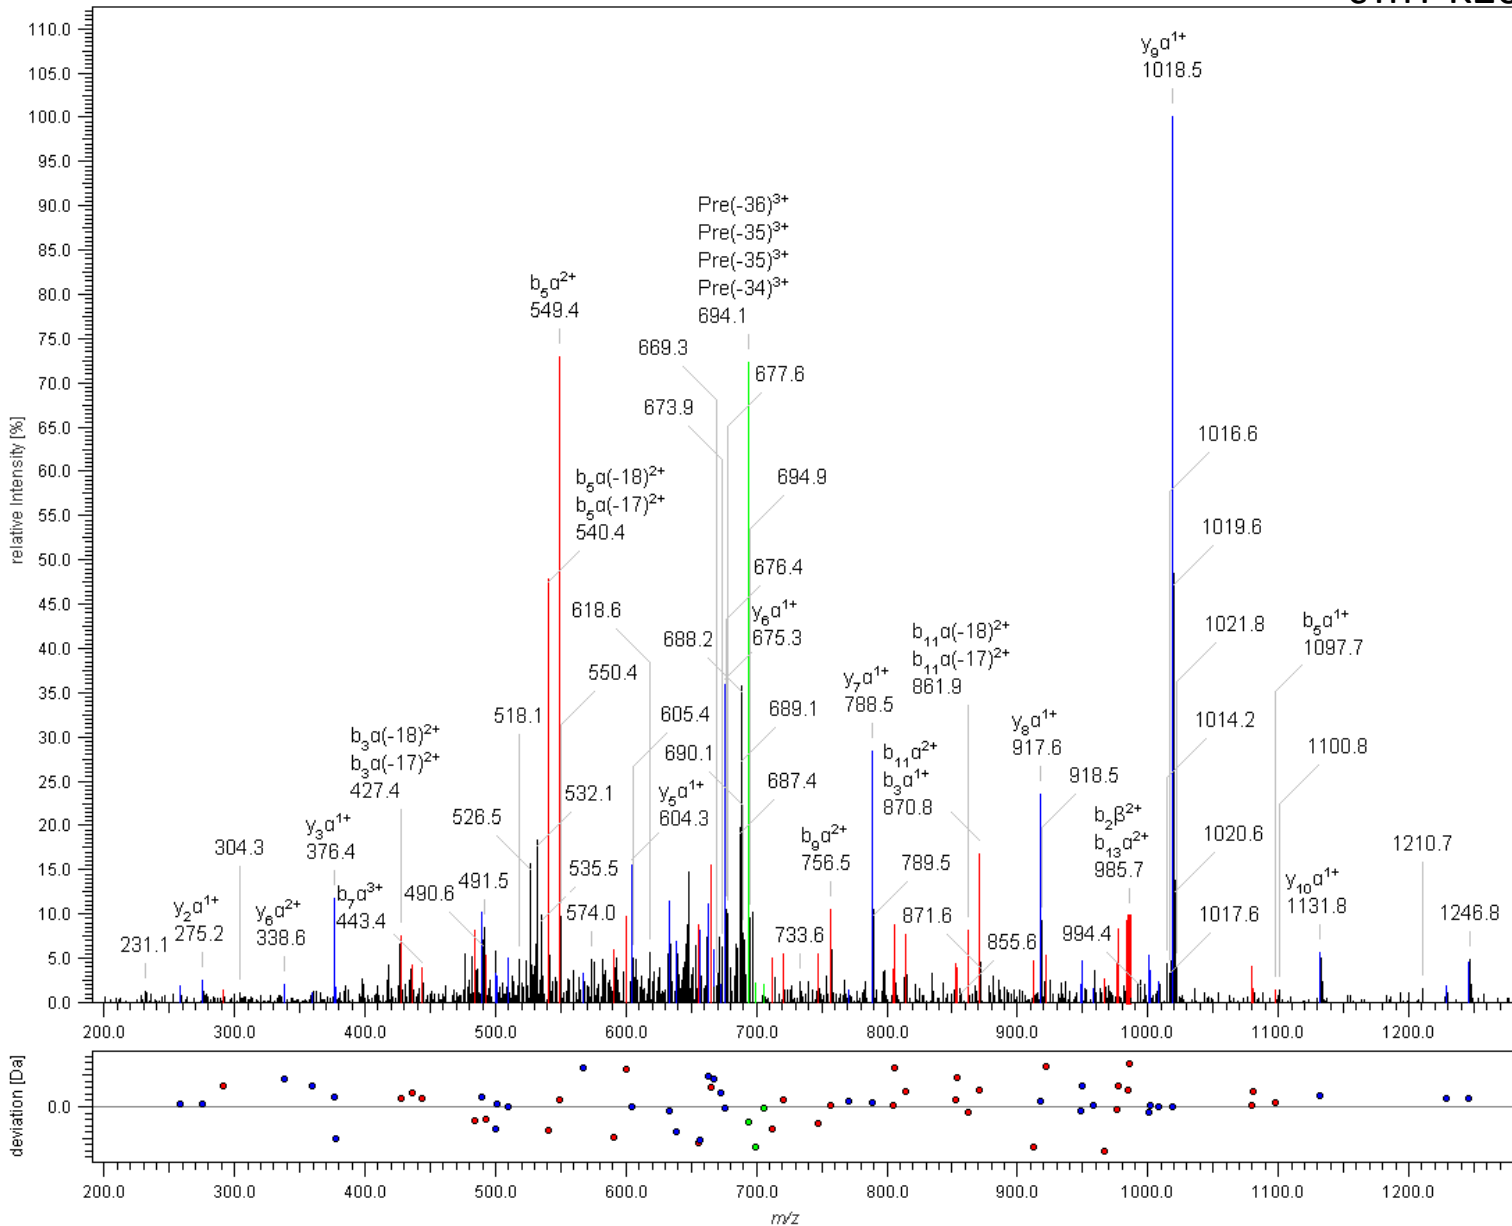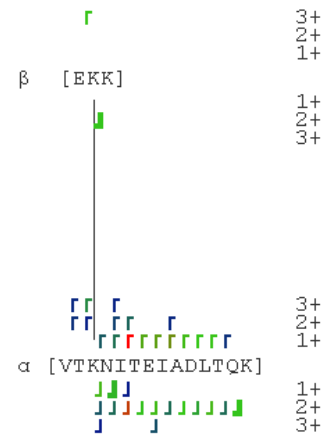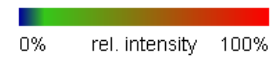

EKK (cTnT 206-208)

VTKNITEIADLTQK (cTnI 118-131)

cTnT K207 – cTnI K120

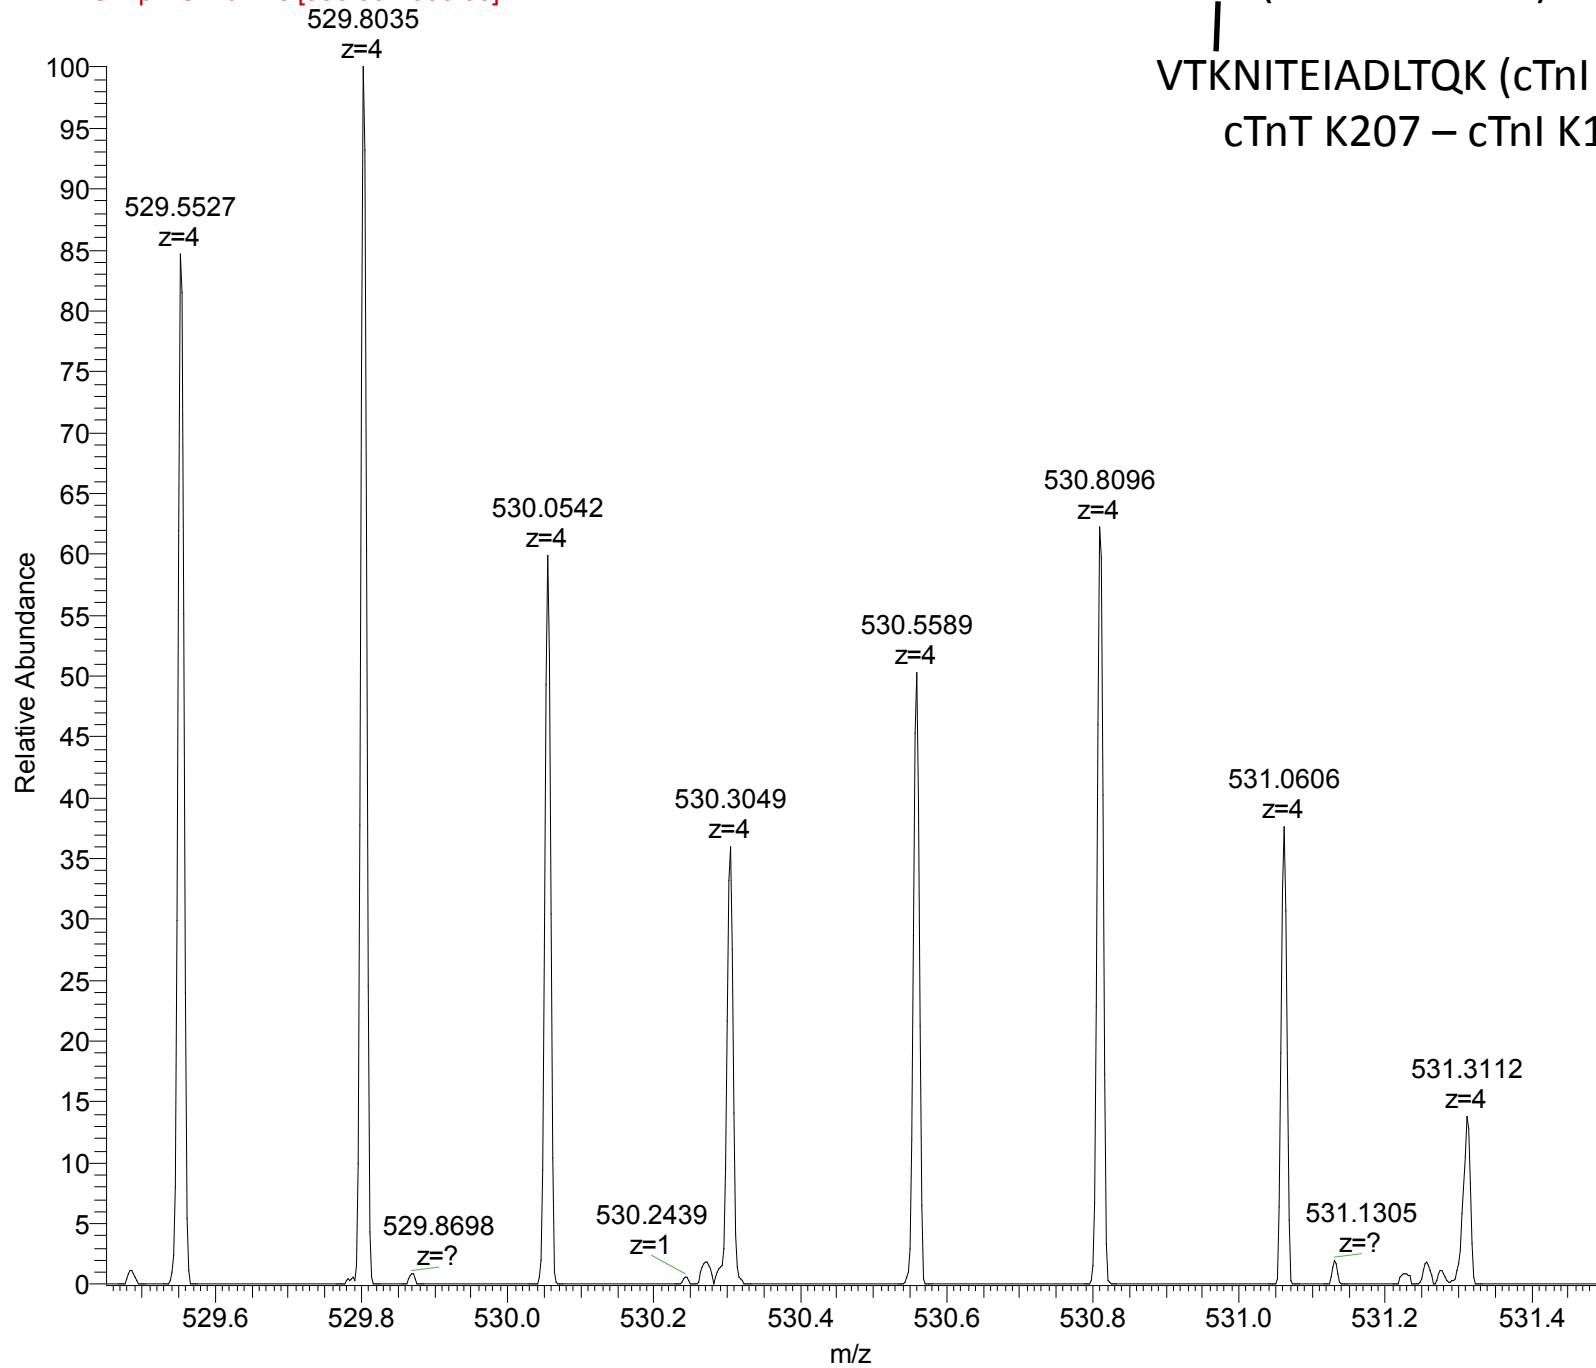

File: F:\Proje ... rad\_4uL\_1.mzXML\_8.zhrs  
 Scan: 10651  
 theor. Mass (M + H+): 2115.1907  
 meas. Mass (M + H+): 2115.1903  
 Deviation -0.2 ppm  
 m/z: 529.553039550781  
 Charge: +4

Peptide  $\beta$ : [EKK] (K2)  
 (>sp)P453.. from 206 to 208  
 Peptide  $\alpha$ : [VTKNITEIADLTQK] (K3)  
 (>sp)P194.. from 118 to 131  
 Crosslinker: DSS/B53

Score (117)  
 identified signals (0.0)  
 ion series (0.091)  
 intensity Ratio (0.0)  
 hits/possible ions (0.0)

# EKK (cTnT 206-208)

## VTKNITEIADLTQK (cTnI 118-131)

### cTnT K207 – cTnI K120

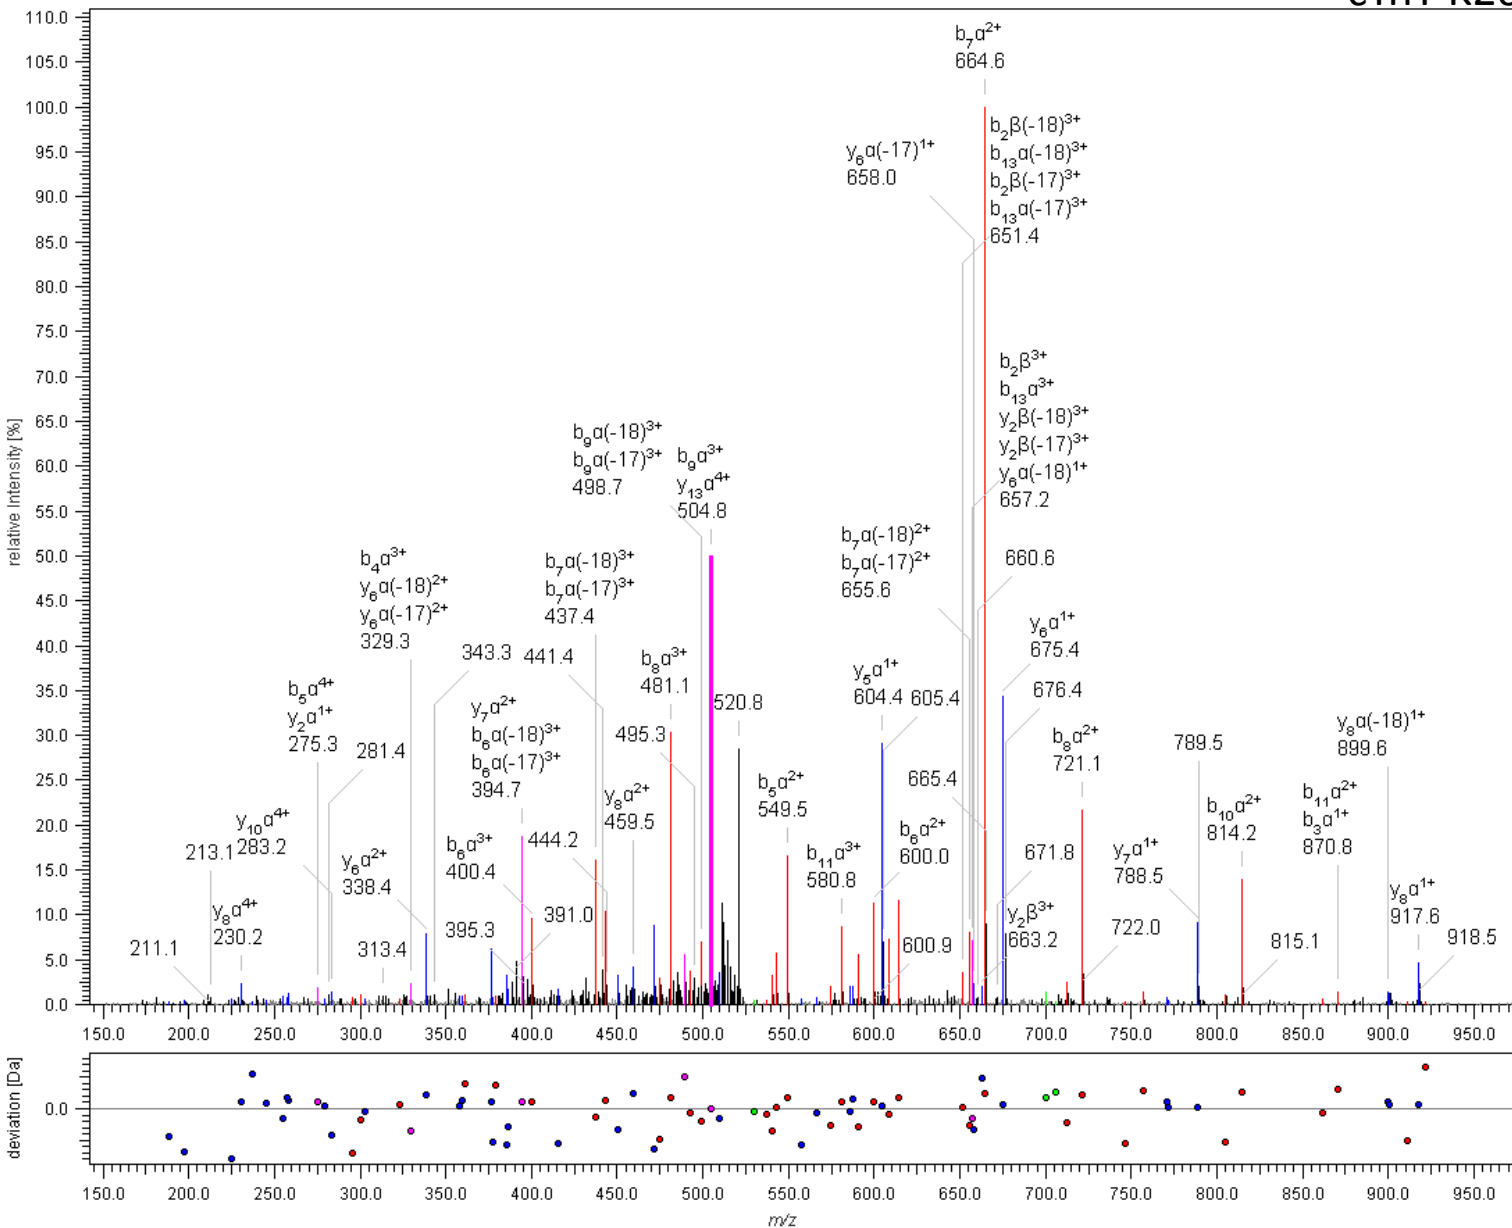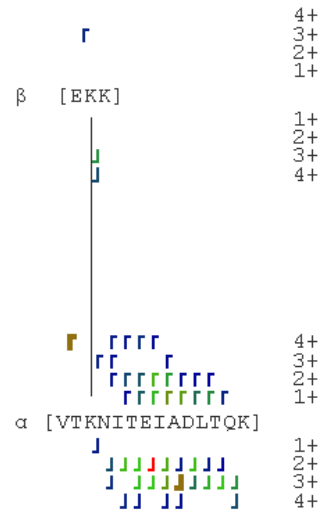

0% rel. intensity 100%



FKQVK (cTnT 254-258)

YDIEAKVTK (cTnI 112-120)

cTnT K255 – cTnI K117

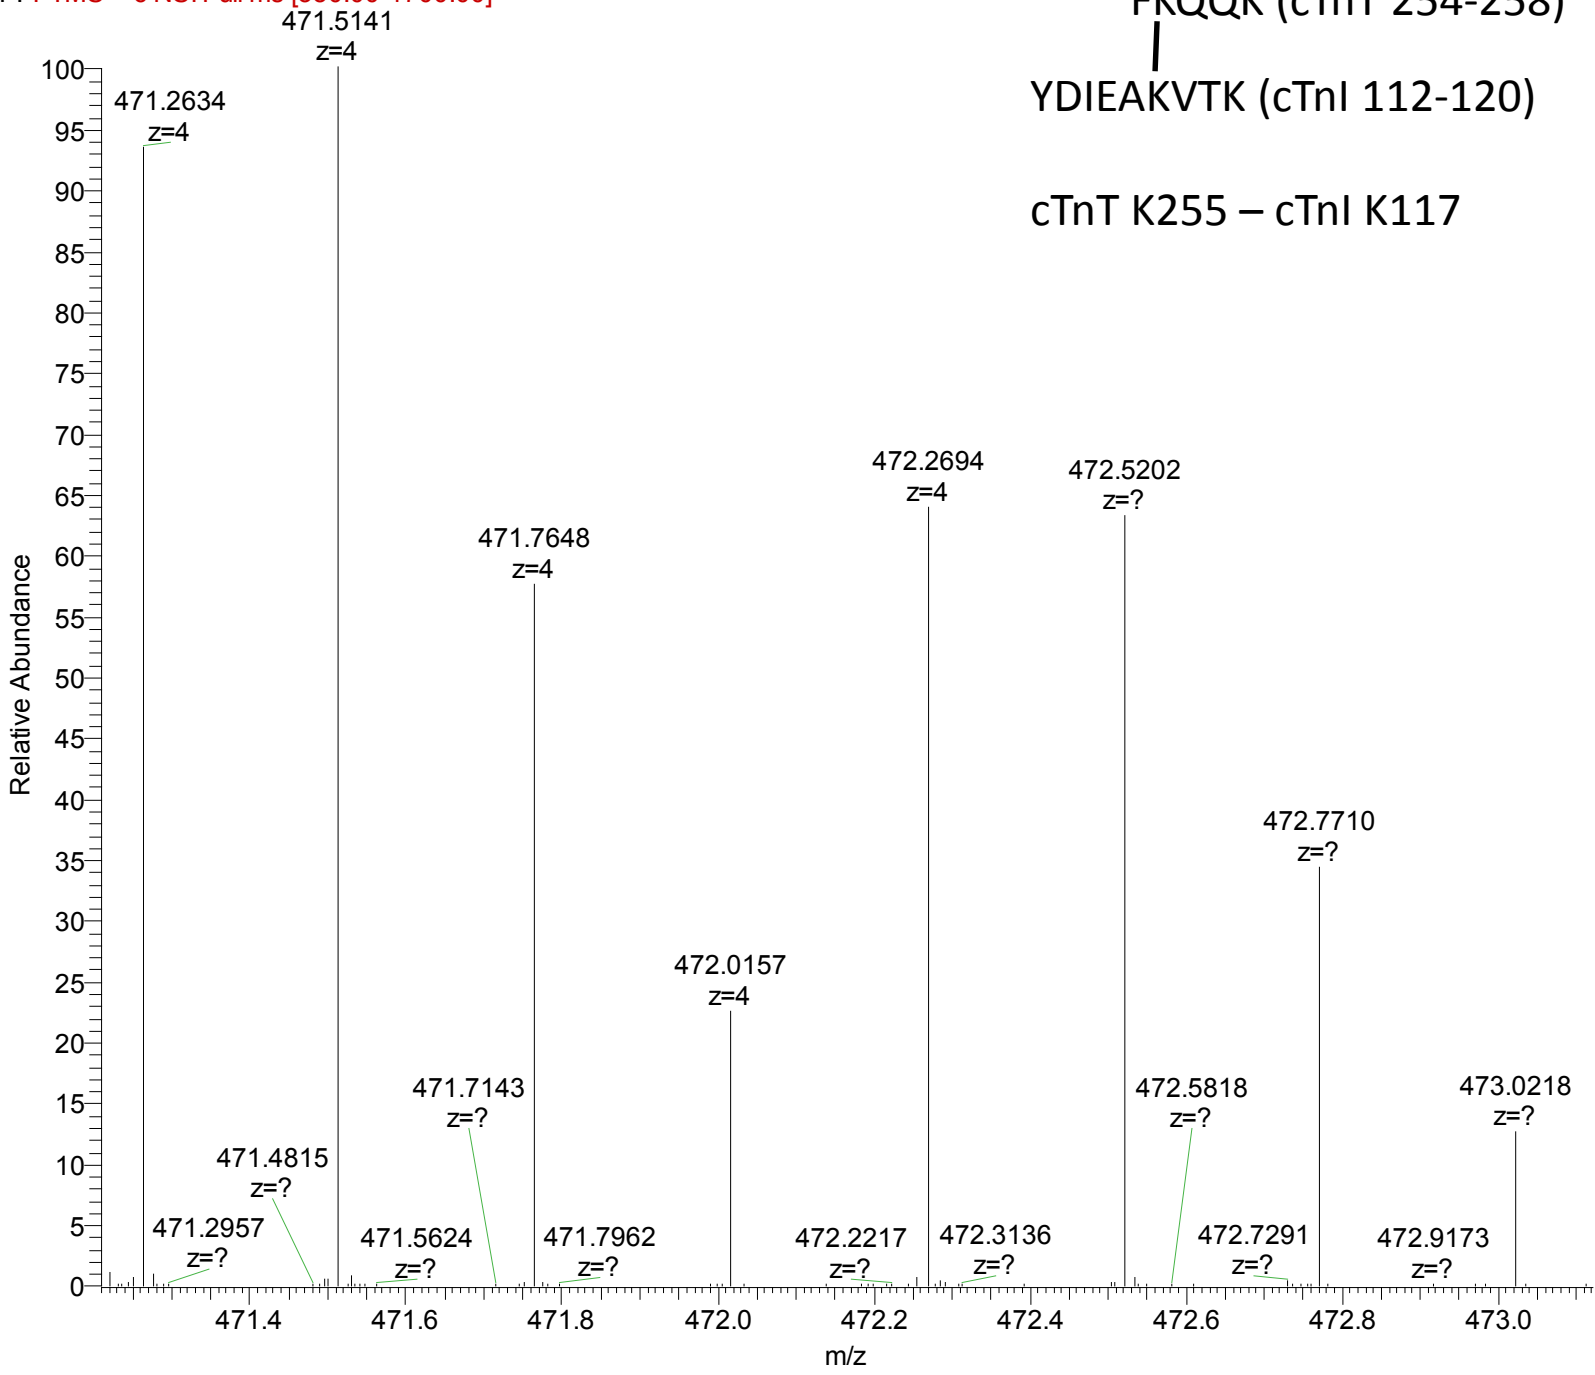

File: F:\Proje ... rad\_5uL\_1.mzXML\_5.zhrs  
 Scan: 12960  
 theor. Mass (M + H+): 1882.032  
 meas. Mass (M + H+): 1882.0297  
 Deviation -1.3 ppm  
 m/z: 471.262878417969  
 Charge: +4

Peptide β: [FKQQK] (K2)  
 (→sp|P453.. from 254 to 258)  
 Peptide α: [YDIEAKVTK] (K6)  
 (→sp|P194.. from 112 to 120)  
 Crosslinker: DSS/BS3

Score (172)  
 identified signals (0.0)  
 ion series (0.0)  
 intensity Ratio (0.002)  
 hits/possible ions (0.0)

**FKQQK (cTnT 254-258)**  
**|**  
**YDIEAKVTK (cTnI 112-120)**

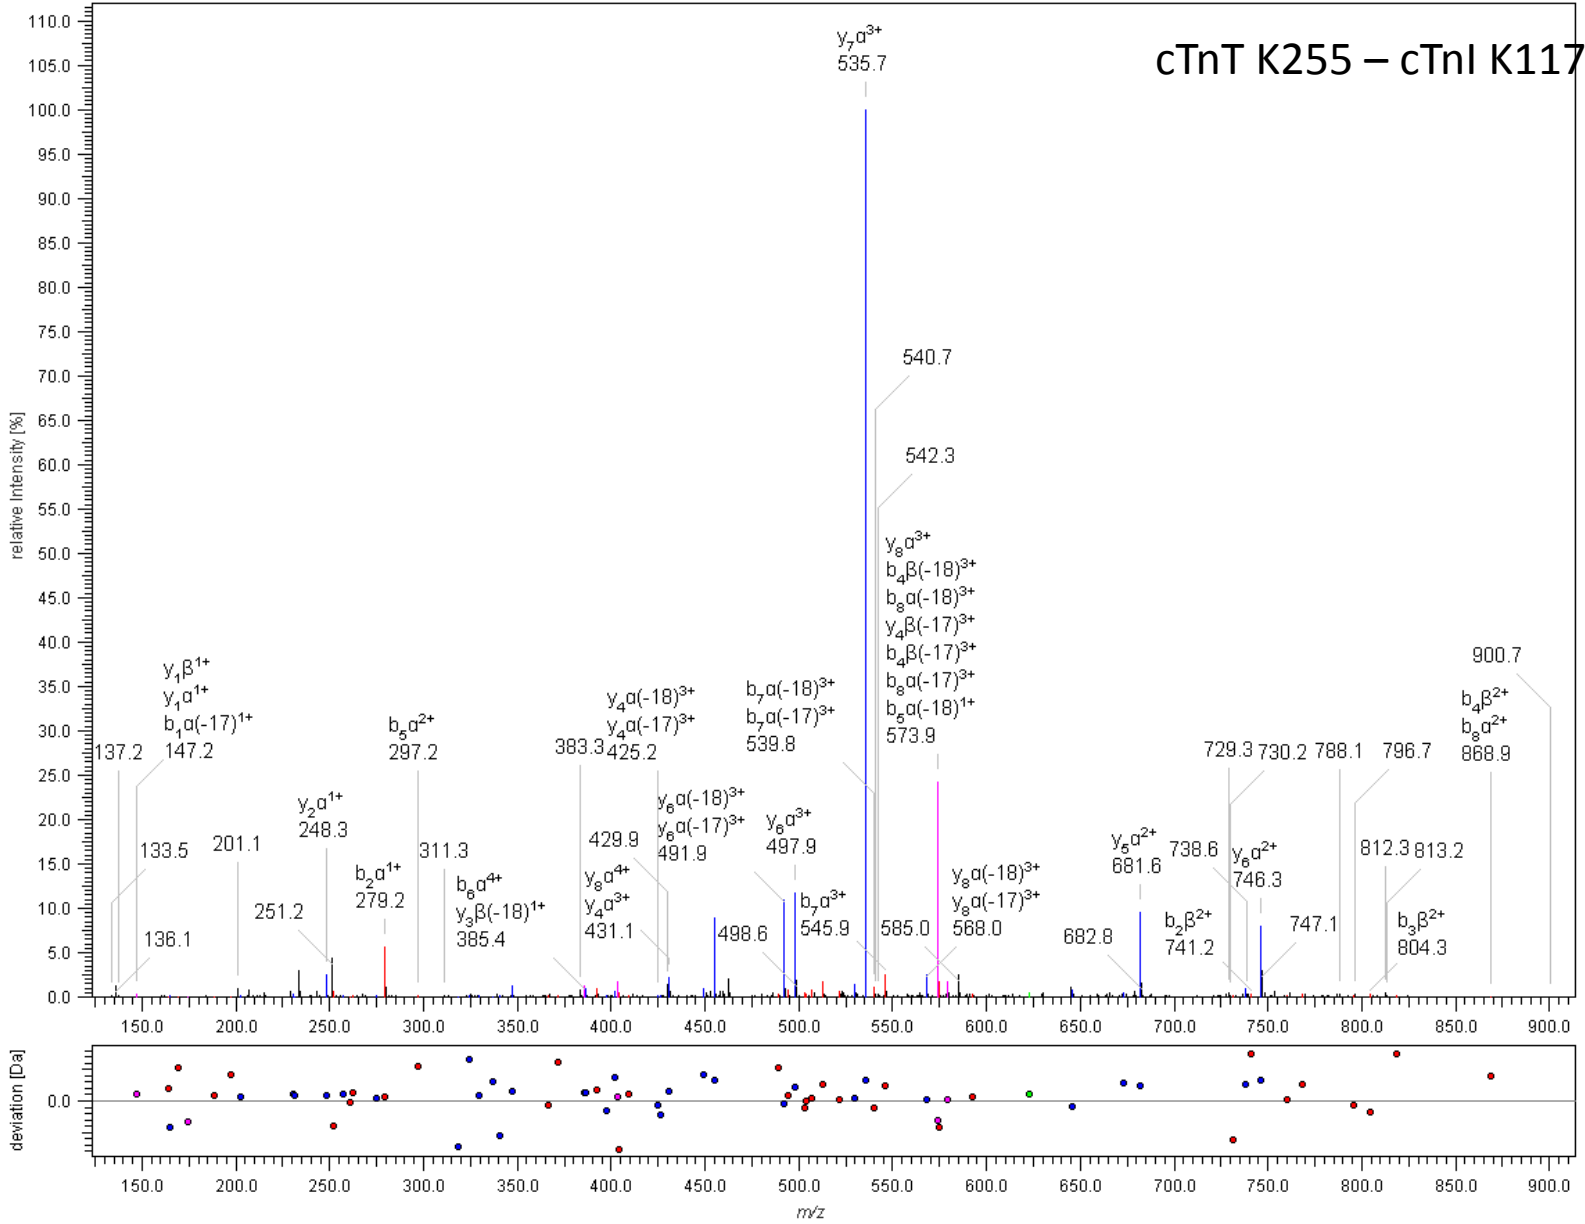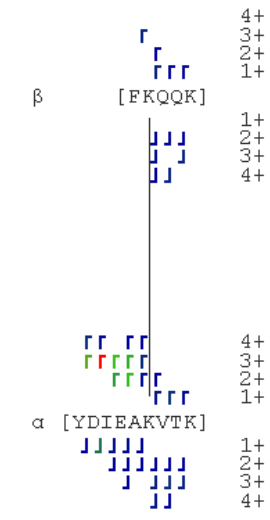

0% rel. intensity 100%

FKQQK (cTnT 254-258)

YDIEAKVTK (cTnI 112-120)

cTnT K255 – cTnI K117

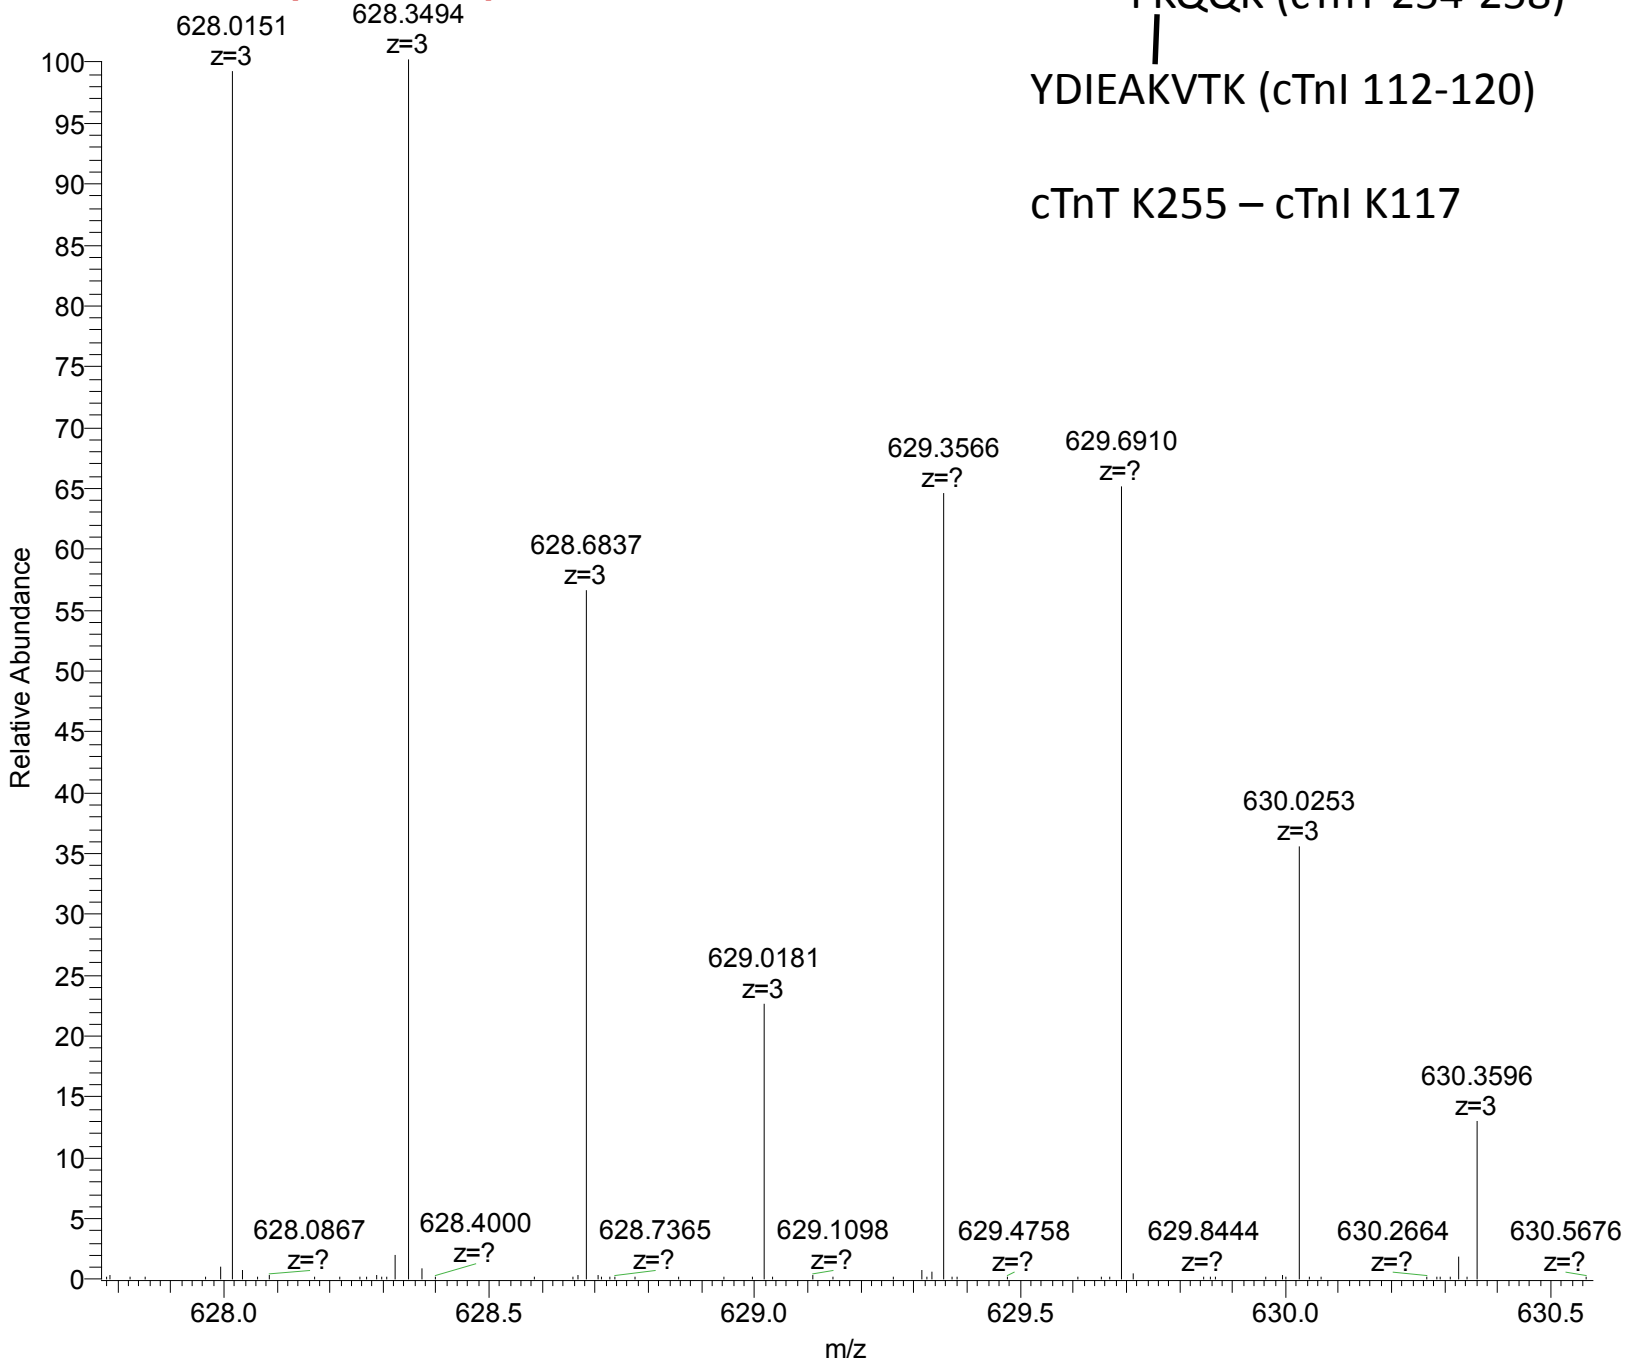

File: F:\Proje ... rad\_5uL\_1.mzXML\_2.zhrs  
 Scan: 12968  
 theor. Mass (M + H+): 1882.032  
 meas. Mass (M + H+): 1882.0327  
 Deviation 0.3 ppm  
 m/z: 628.015747070313  
 Charge: +3

Peptide  $\beta$ : [FKQQK] (K2)  
 ( $\rightarrow$ sp|P453.. from 254 to 258)  
 Peptide  $\alpha$ : [YDIEAKVTK] (K6)  
 ( $\rightarrow$ sp|P194.. from 112 to 120)  
 Crosslinker: DSS/BS3

Score (145)  
 identified signals (0.001)  
 ion series (0.0)  
 intensity Ratio (0.002)  
 hits/possible ions (0.0)

FKQQK (cTnT 254-258)  
 |  
 YDIEAKVTK (cTnI 112-120)

cTnT K255 – cTnI K117

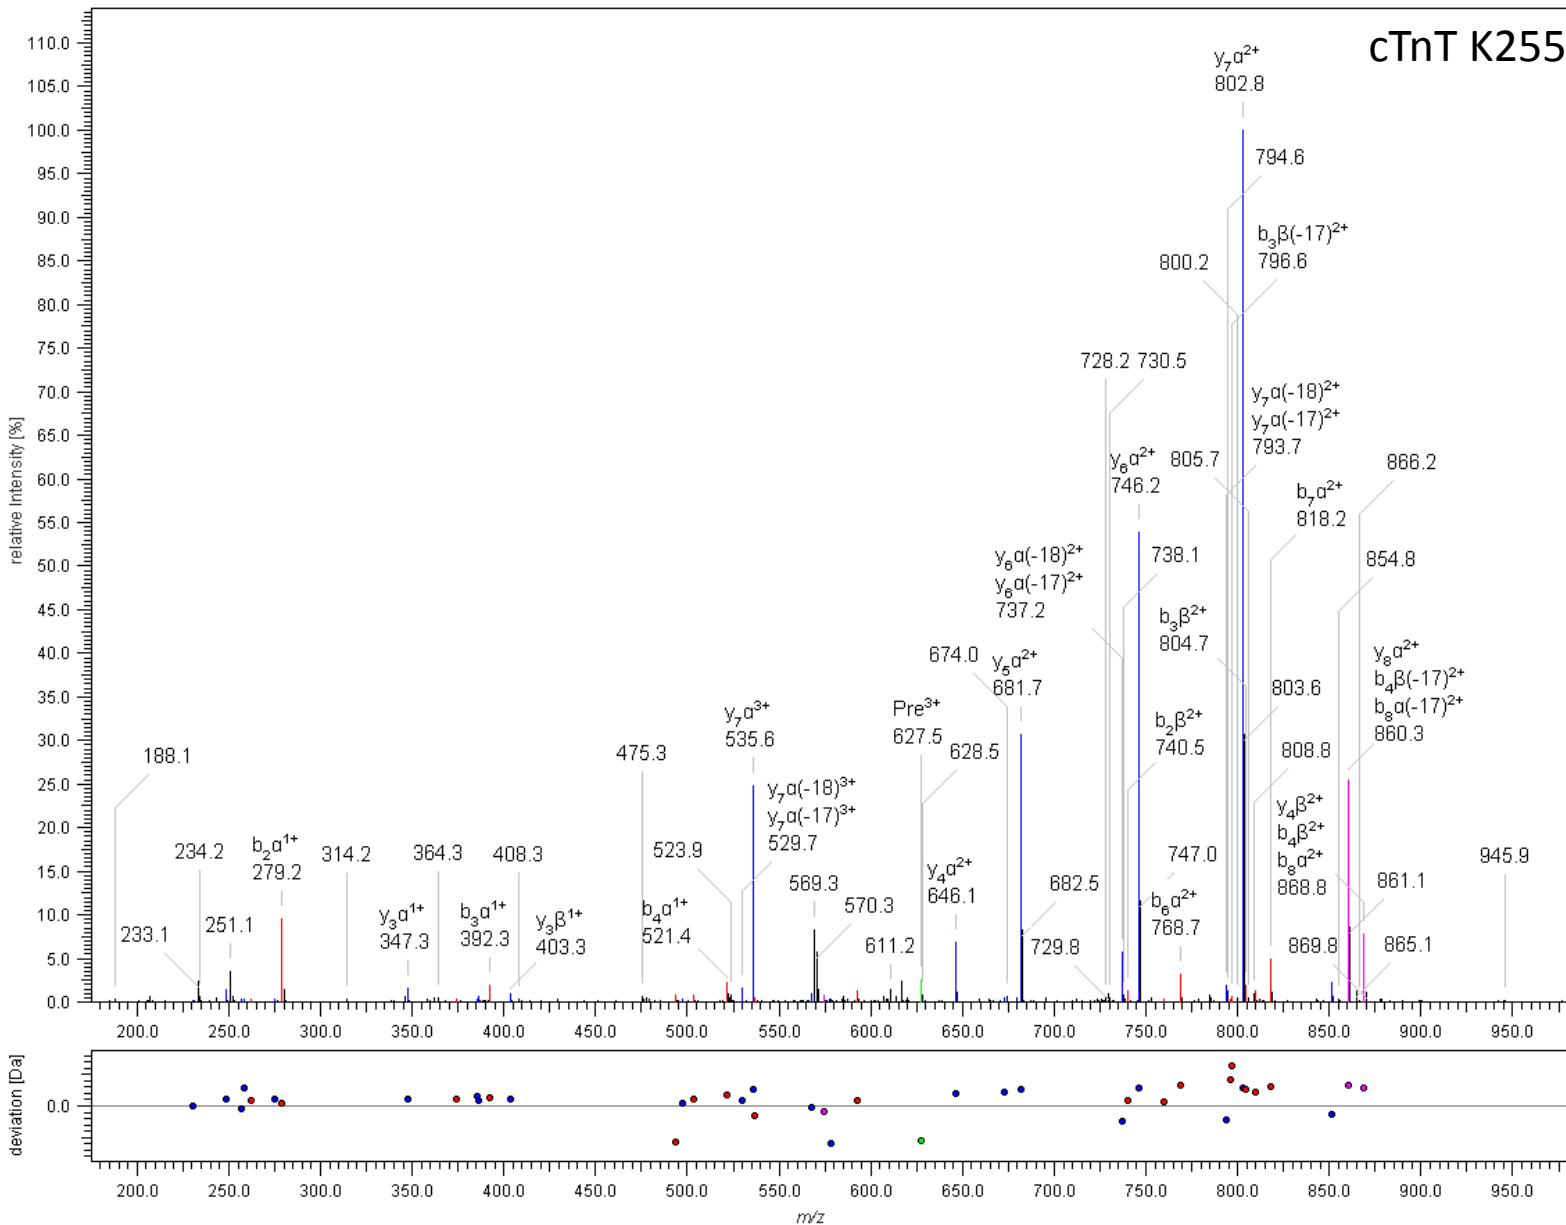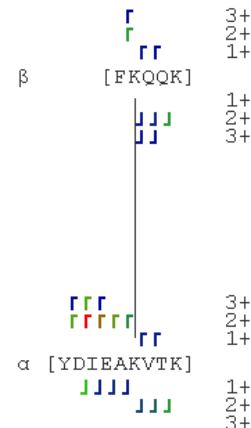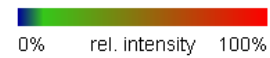

QQKYEINVLR (cTnT 256-265)

YDIEAKVTK (cTnI 112-120)

cTnT K258 – cTnI K117

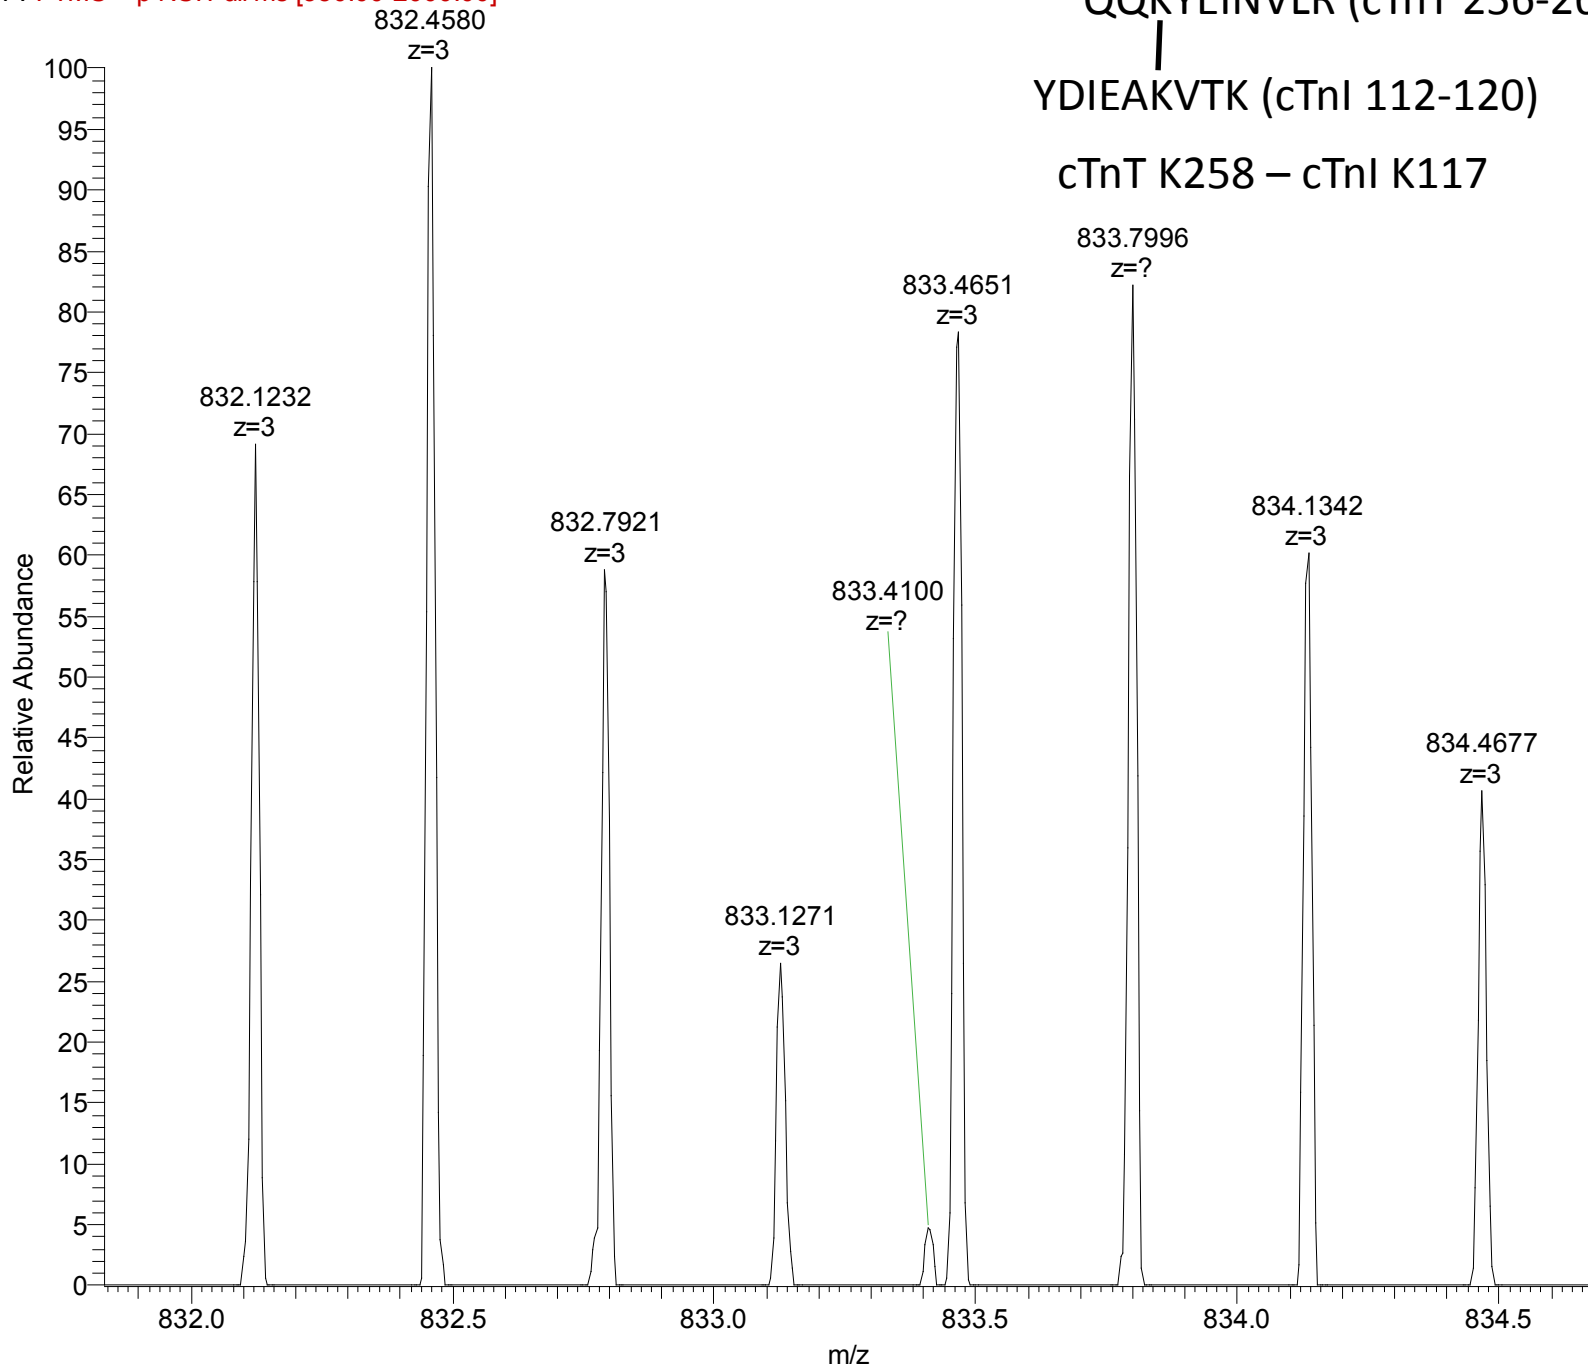

File: F:\Proje ... rad\_4uL\_1.mzXML\_3.zhrs  
 Scan: 9988  
 theor. Mass (M + H+): 2494.3552  
 meas. Mass (M + H+): 2494.3515  
 Deviation -1.5 ppm  
 m/z: 832.122009277344  
 Charge: +3

Peptide  $\beta$ : [YDIEAKVTK] (K6)  
 (>sp)P194.. from 112 to 120  
 Peptide  $\alpha$ : [QQKYEINVLR] (K3)  
 (>sp)P453.. from 256 to 265  
 Crosslinker: DSS/BS3

Score (99)  
 identified signals (0.012)  
 ion series (0.0)  
 intensity Ratio (0.011)  
 hits/possible ions (0.001)

QQKYEINVLR (cTnT 256-265)  
 |  
 YDIEAKVTK (cTnI 112-120)  
 cTnT K258 – cTnI K117

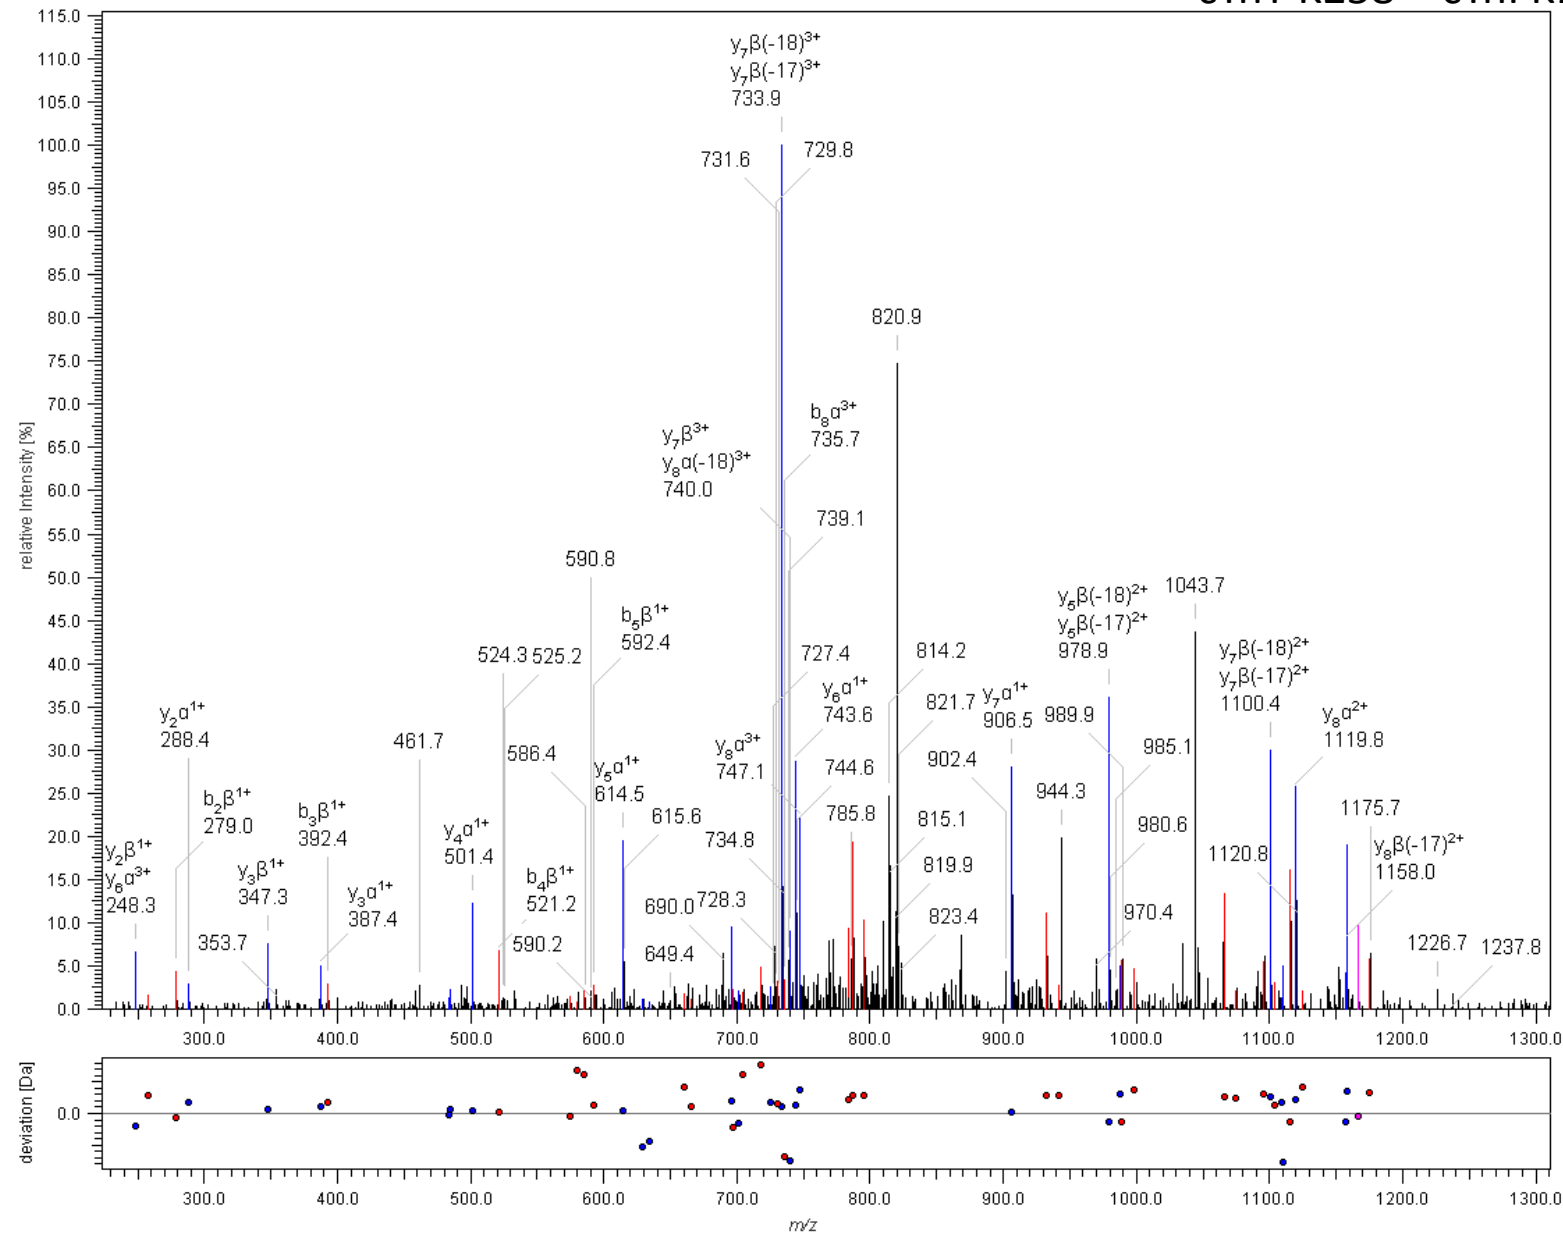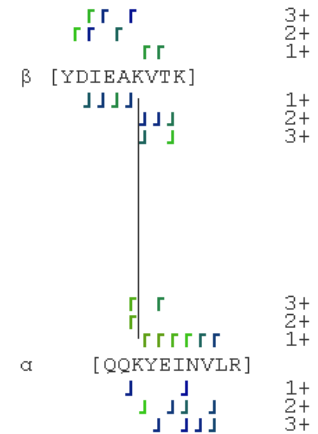

0% rel. intensity 100%

QQKYEINVLR (cTnT 256-265)

VTKNITEIADLTQK (cTnI 118-131)

cTnT K258 – cTnI K120

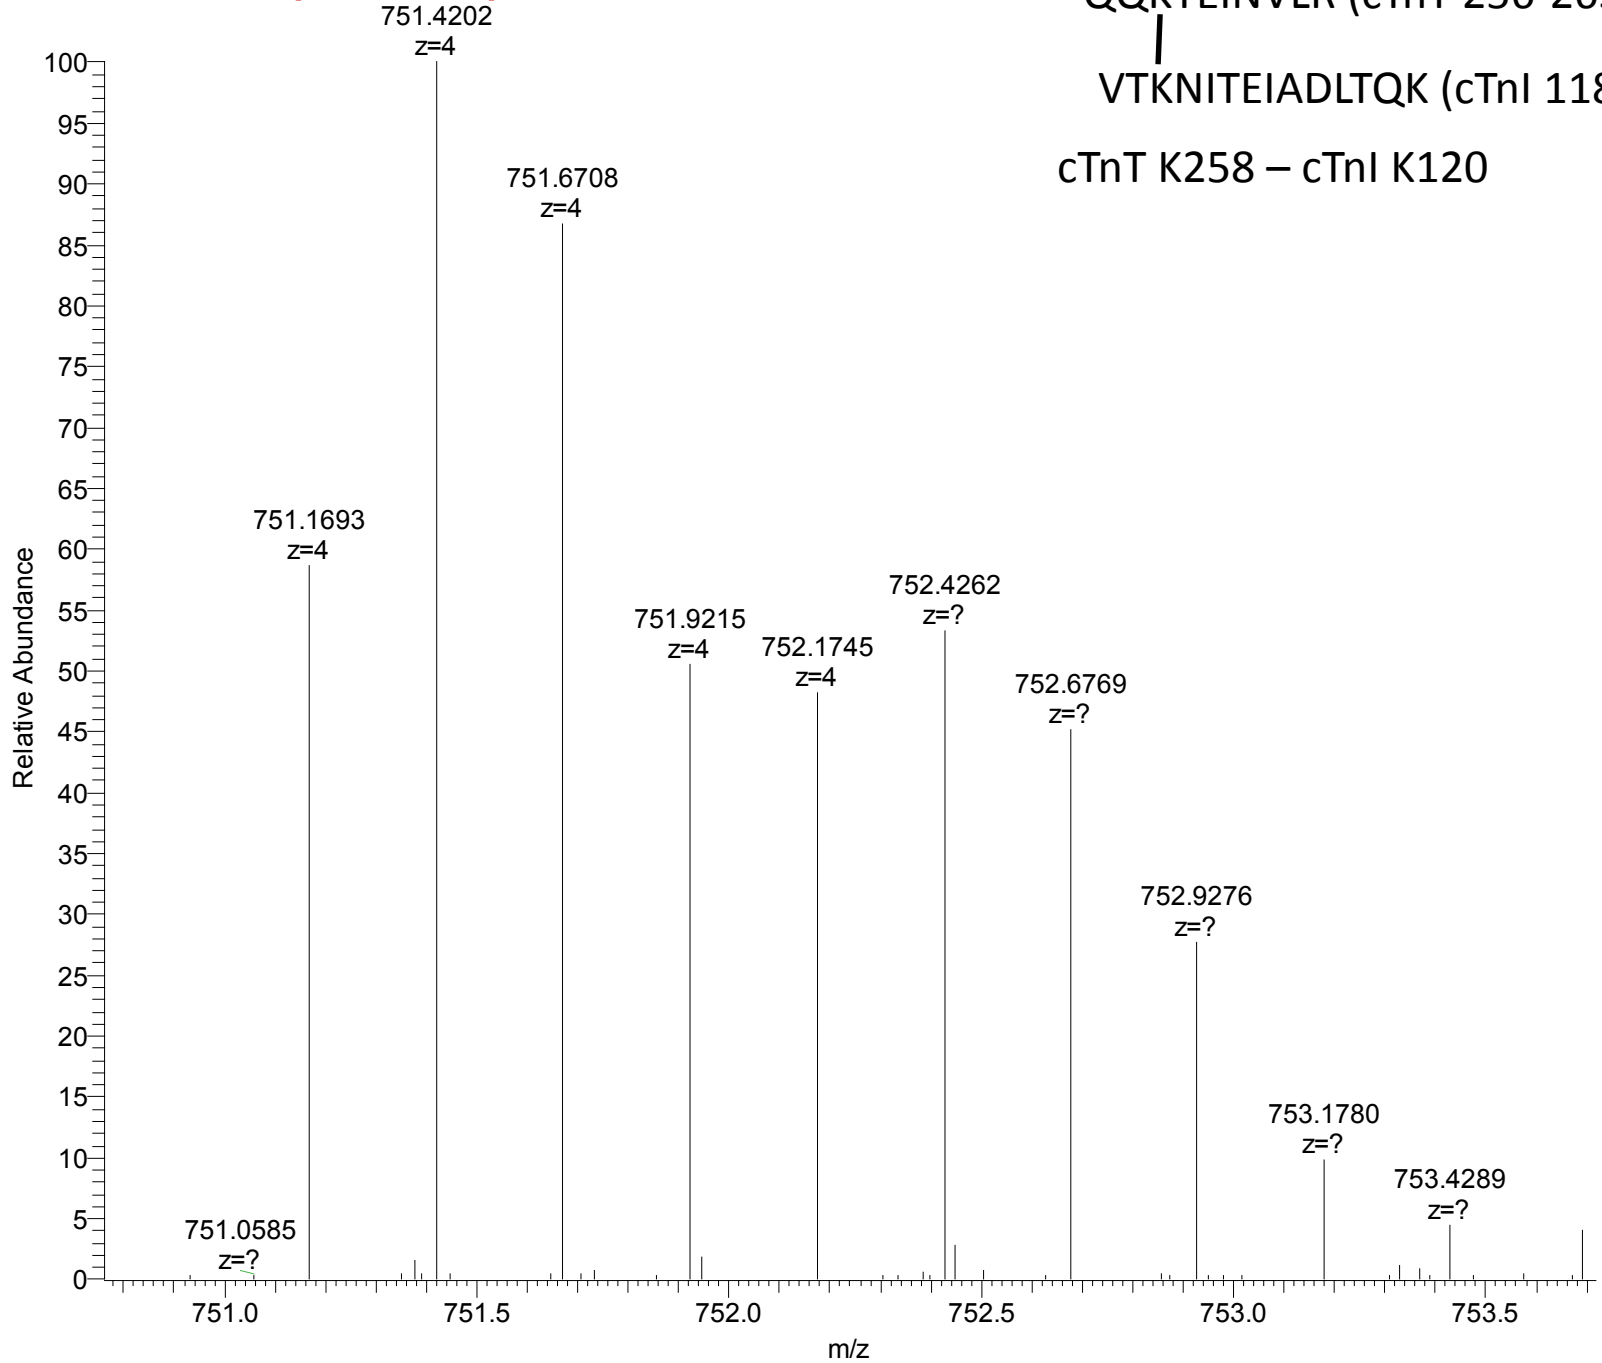

File: F:\Proje ... rad\_5uL\_1.mzXML\_9.zhrs  
 Scan: 21981  
 theor. Mass (M + H<sup>+</sup>): 3001.6568  
 meas. Mass (M + H<sup>+</sup>): 3001.6542  
 Deviation -0.9 ppm  
 m/z: 751.169006347656  
 Charge: +4

Peptide  $\beta$ : [QQKYEINVLR] (K3)  
 (>sp|P453.. from 256 to 265)  
 Peptide  $\alpha$ : [VTKNITEIADLTQK] (K3)  
 (>sp|P194.. from 118 to 131)  
 Crosslinker: DSS/BBS3

Score (127)  
 identified signals (0.006)  
 ion series (0.0)  
 intensity Ratio (0.003)  
 hits/possible ions (0.001)

QQKYEINVLR (cTnT 256-265)  
 |  
 VTKNITEIADLTQK (cTnI 118-131)  
 cTnT K258 – cTnI K120

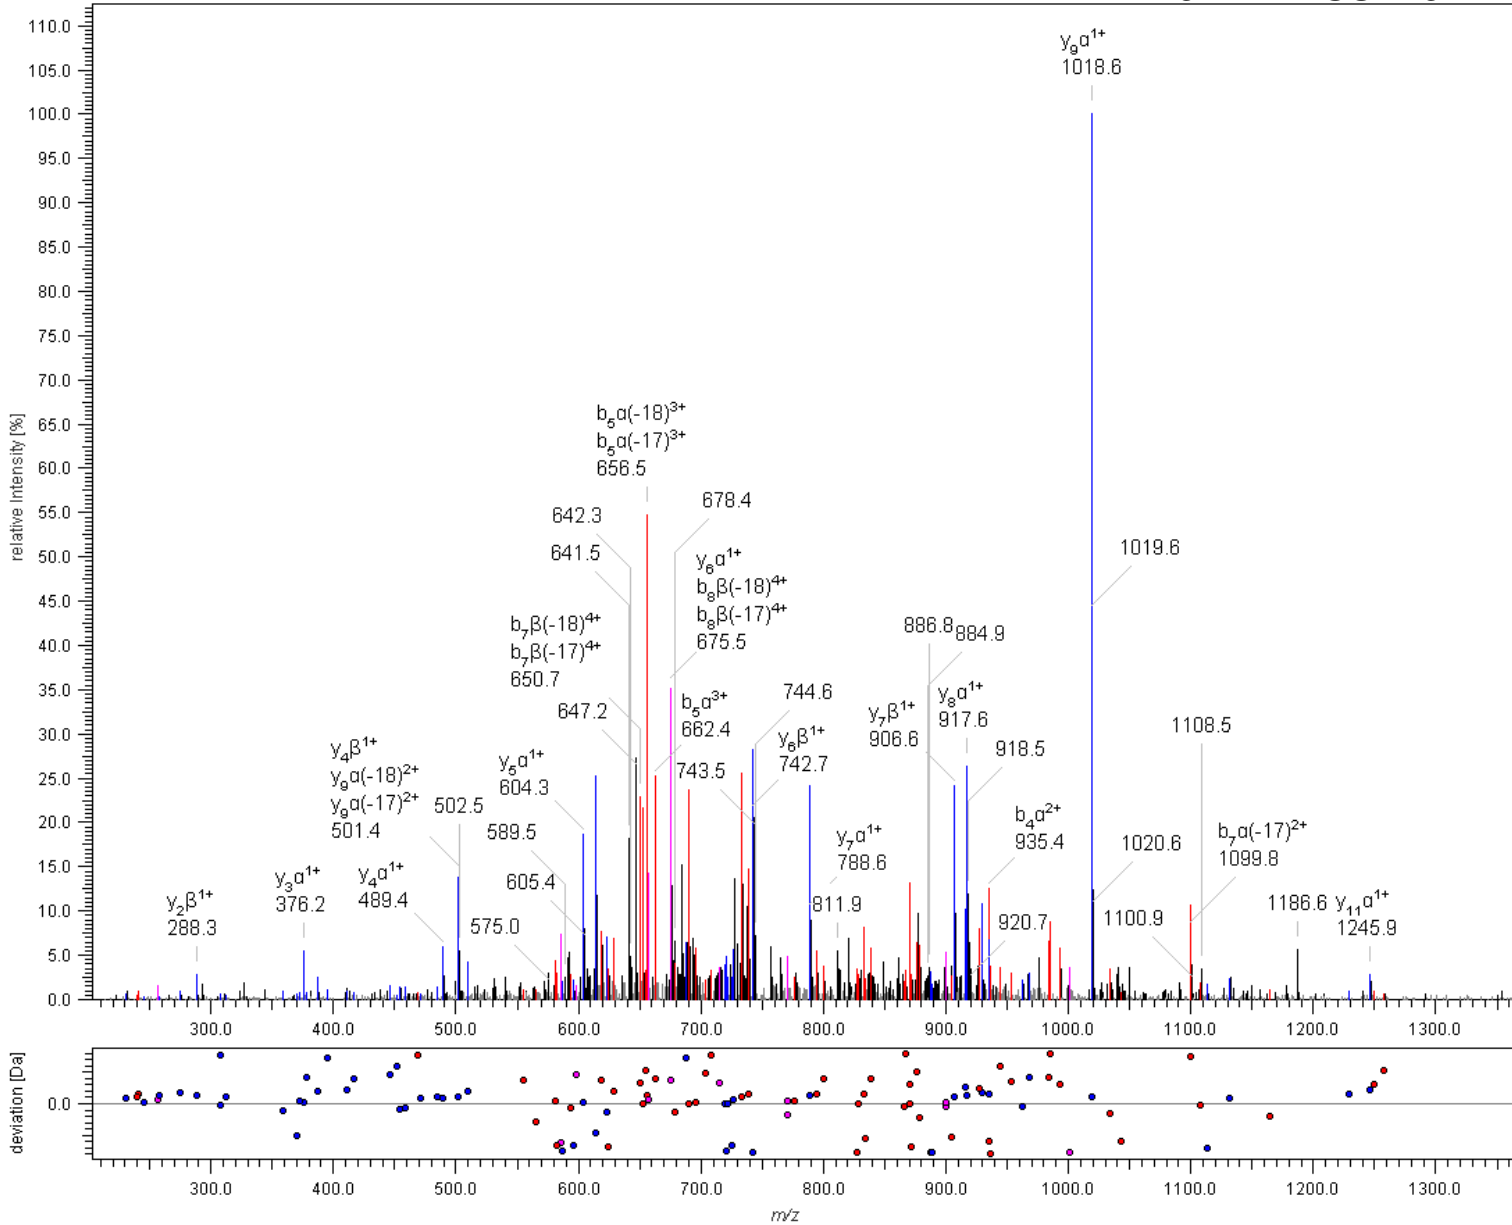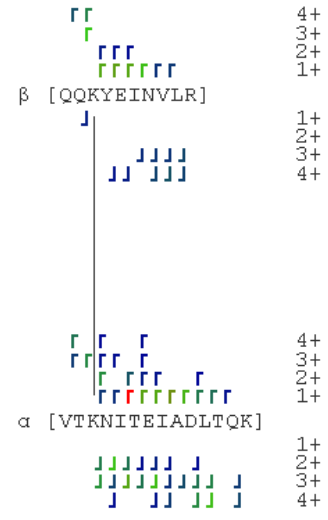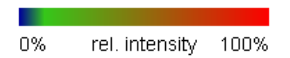



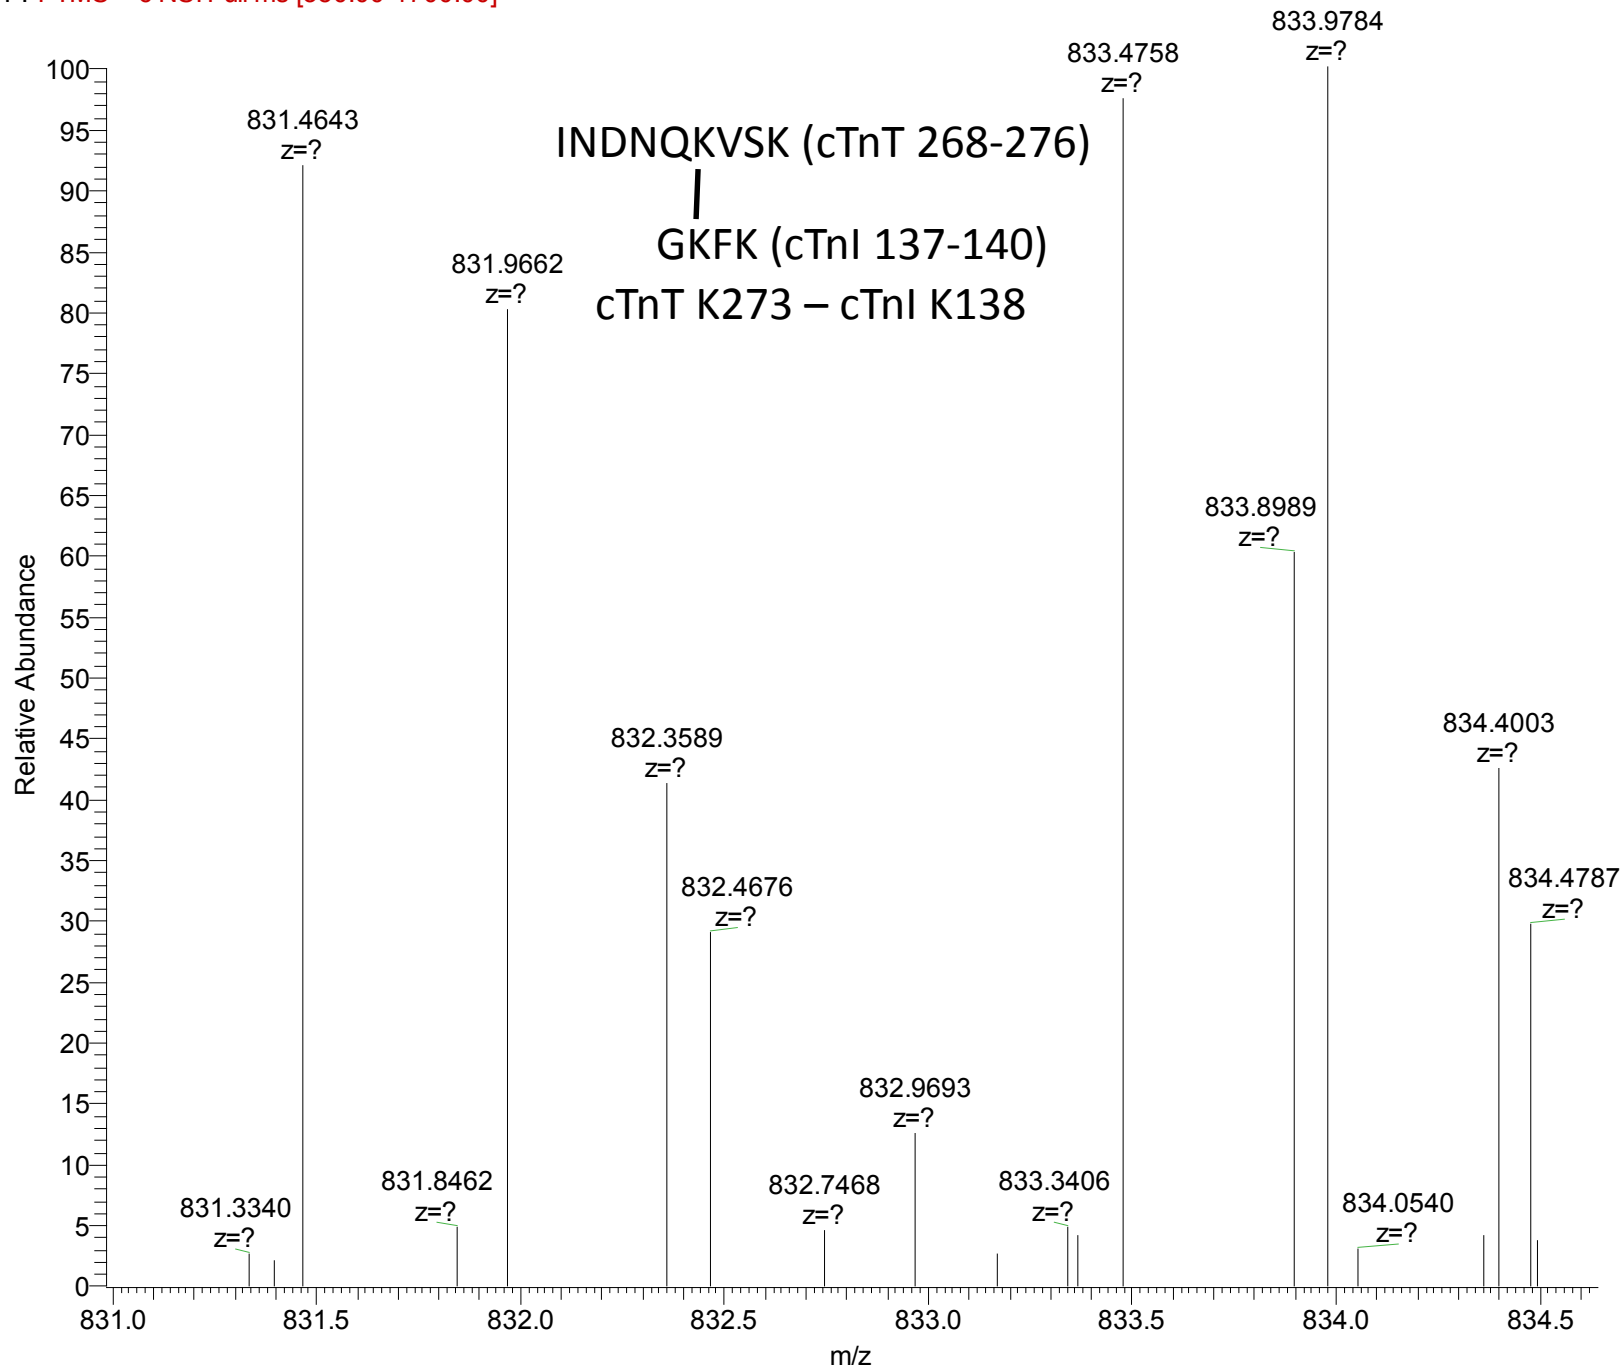

File: F:\Proje ... rad\_5uL\_1.mzXML\_0.zhrs  
 Scan: 8270  
 theor. Mass (M + H+): 1661.9221  
 meas. Mass (M + H+): 1661.9188  
 Deviation -1.9 ppm  
 m/z: 831.463073730469  
 Charge: +2

Peptide  $\beta$ : [GKFK] (K2)  
 ( $\rightarrow$ sp|P194... from 137 to 140)  
 Peptide  $\alpha$ : [INDNQKVS] (K6)  
 ( $\rightarrow$ sp|P453... from 268 to 276)  
 Crosslinker: DSS/BS3

Score (107)  
 identified signals (0.014)  
 ion series (0.016)  
 intensity Ratio (0.002)  
 hits/possible ions (0.0)

# INDNQKVS (cTnT 268-276)

## GKFK (cTnI 137-140)

### cTnT K273 – cTnI K138

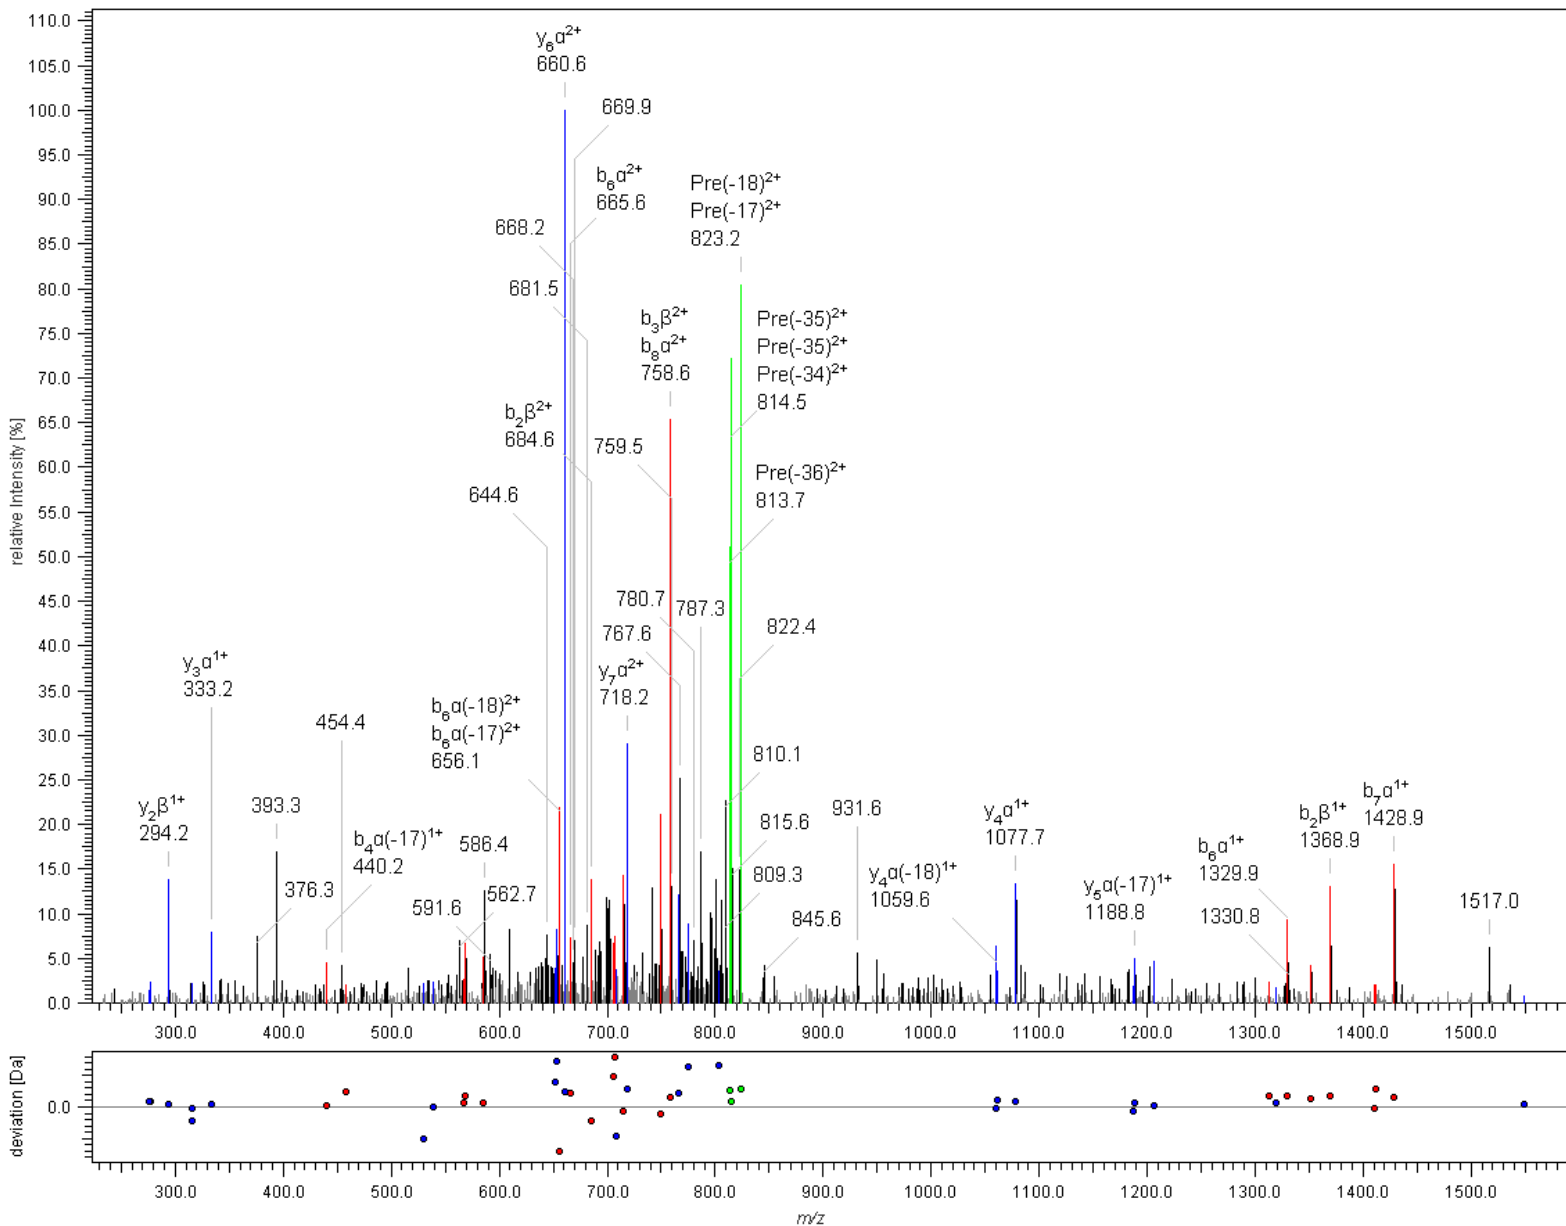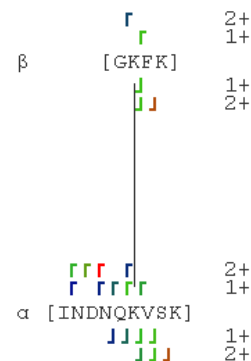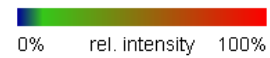

**[AKVTGR] - {MDDIYK} TnT K282 – TnC K6**

**[M+3H]<sup>3+</sup> *m/z* exptl. 518.2721**

**[M+H]<sup>+</sup> *m/z* exptl. 1552.8019, calc. 1552.8040**

**Mass error -1.32 ppm**

518.2721

518.6067

519.6145

519.9487

←  $\Delta\text{mass} = 4.0272 \text{ Da}$  →

518.2

518.8

*m/z* 519.4

520.0

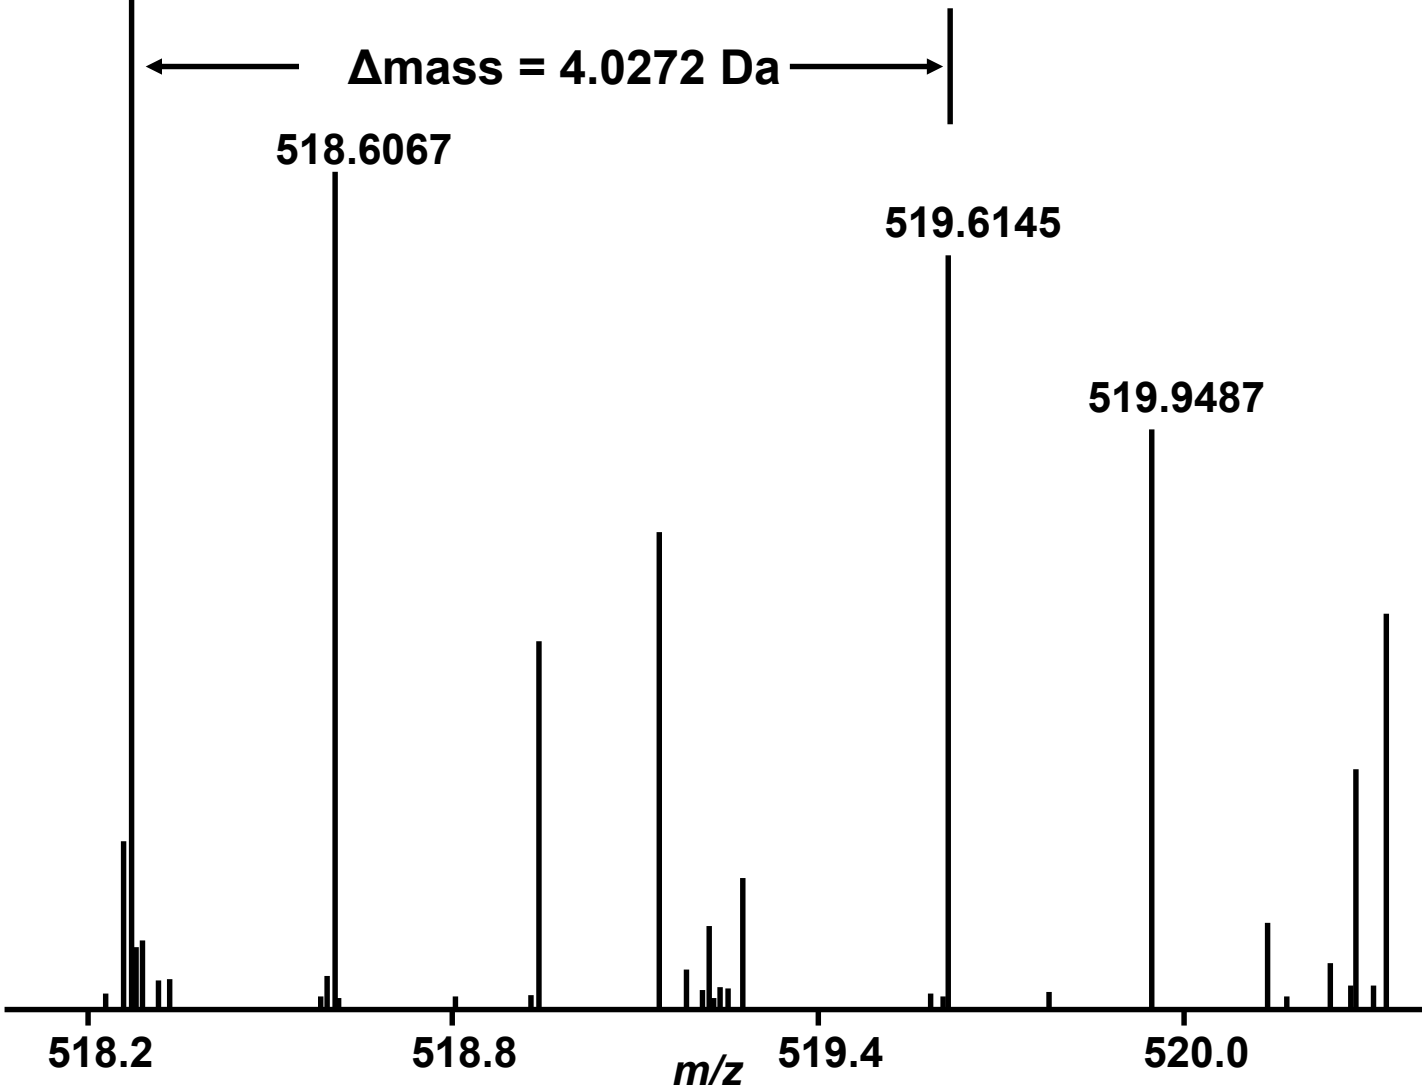

Detail Window

File: C:\Users ... rad\_5uL\_1.mzXML\_7.zhrs  
 Scan: 12778  
 theor. Mass (M + H+): 1552.804  
 meas. Mass (M + H+): 1552.8037  
 Deviation -0.1 ppm  
 m/z: 518.272766113281  
 Charge: +3

Peptide  $\beta$ : [AKVTGR] (K2)  
 (>sp)P453.. from 281 to 286  
 Peptide  $\alpha$ : [MDDIYK] (K6)  
 (>sp)P633.. from 0 to 6  
 Crosslinker: DSS/BS3

Score (129)  
 identified signals (0.01)  
 ion series (0.0)  
 intensity Ratio (0.008)  
 hits/possible ions (0.0)

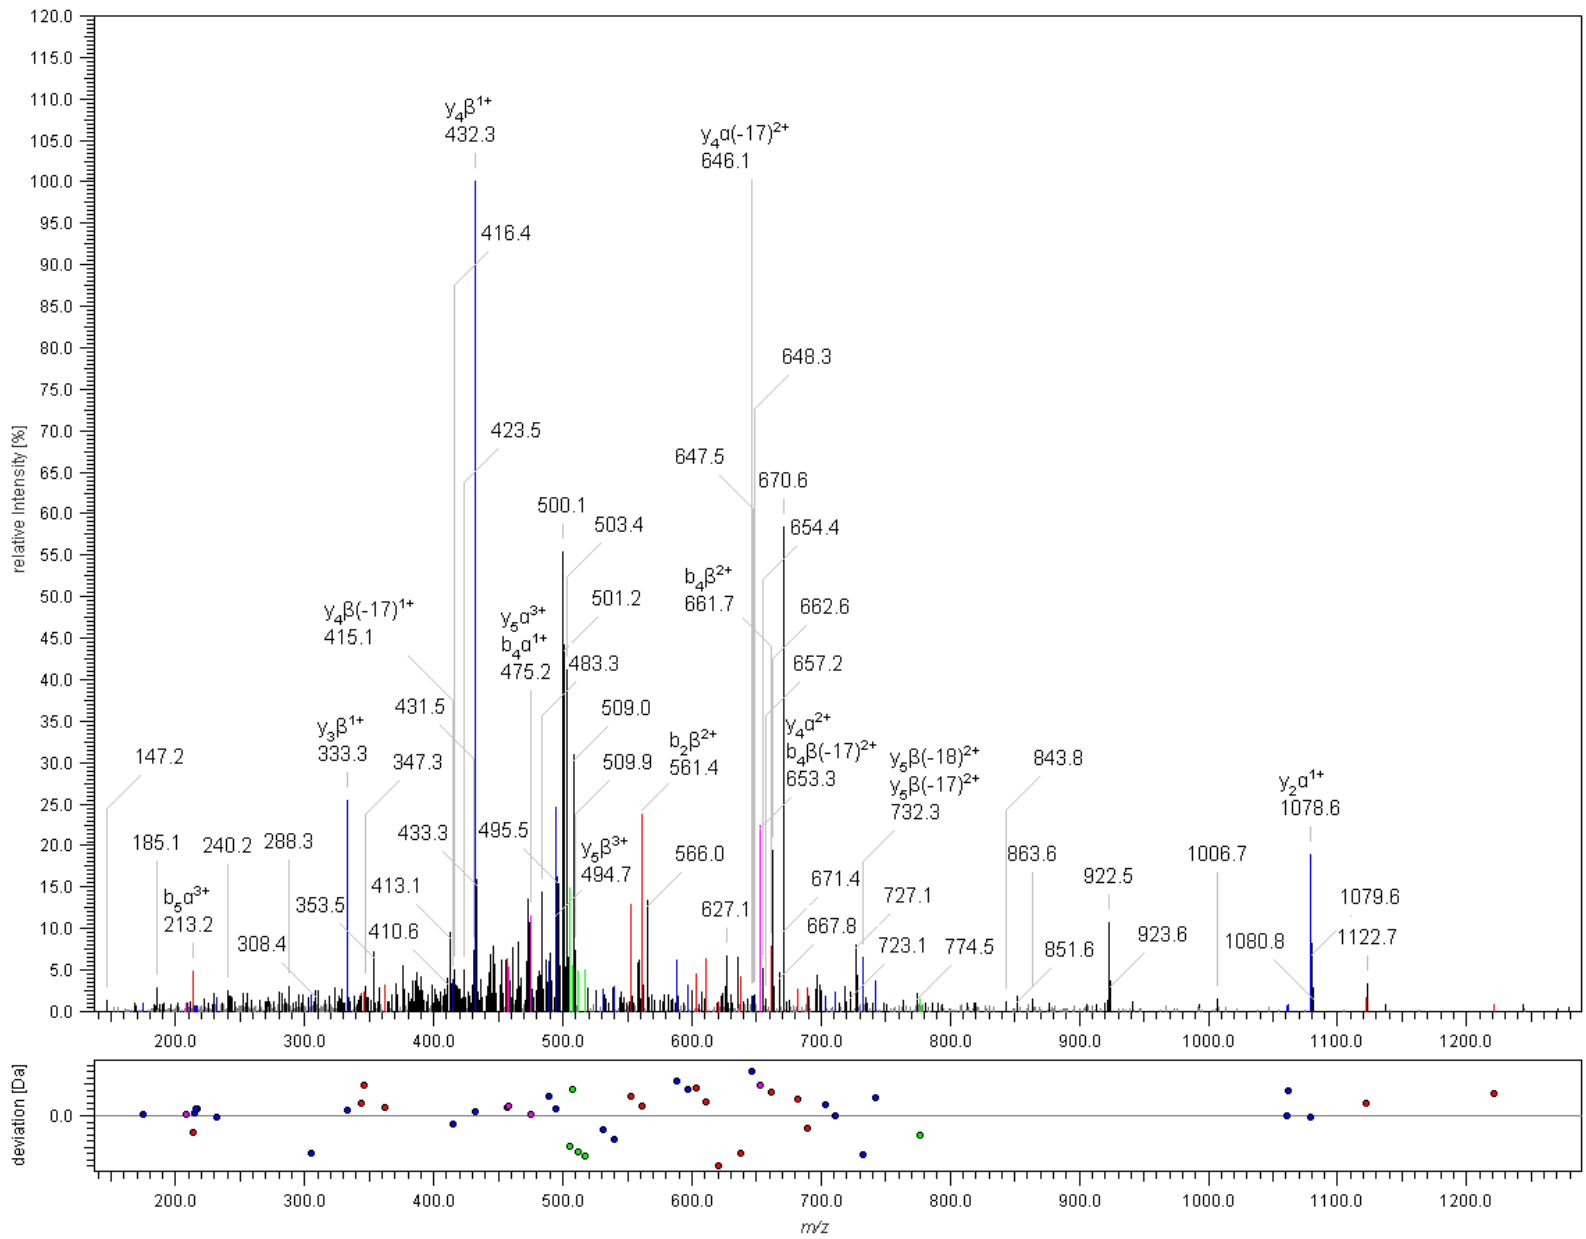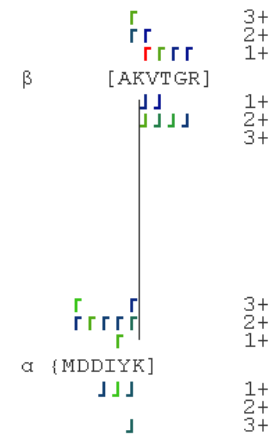

0% rel. intensity 100%
