# Supplementary material
Source: PubMed Central journal article supplement (PMC6937556)
Supplement: supp_RA119.011177_155994_2_supp_428187_q0vd6b.pdf [file supp_RA119.011177_155994_2_supp_428187_q0vd6b.pdf]

**Supporting information:**

**The intrinsically disordered carboxy-terminus of troponin-T binds to troponin-C to modulate myocardial force generation**

Jamie R. Johnston<sup>1</sup>, Maicon Landim-Vieira<sup>1</sup>, Mayra A. Marques<sup>2</sup>, Guilherme A. P. de Oliveira<sup>2</sup>, David Gonzalez-Martinez<sup>1</sup>, Adolfo H. Moraes<sup>3</sup>, Huan He<sup>1,7</sup>, Anwar Iqbal<sup>2</sup>, Yael Wilnai<sup>5</sup>, Einat Birk<sup>6</sup>, Nili Zucker<sup>6</sup>, Jerson L. Silva<sup>2</sup>, P. Bryant Chase<sup>4</sup>, Jose Renato Pinto<sup>1\*</sup>

**Contents:**

Tables S1-S2

Figures: S1-S5

**Table S1. In silico prediction tools applied to *TNNC1*-p.Ile4Met**

|                   | <b>MutPred2</b> | <b>PolyPhen-2</b> | <b>MutationTaster</b> | <b>SIFT</b> |
|-------------------|-----------------|-------------------|-----------------------|-------------|
| <b>Prediction</b> | Pathogenic      | Benign            | Disease-causing       | Tolerated   |

Predictions were performed on MutPred2 (1), PolyPhen-2 (2), MutationTaster (3), and SIFT (4) using the FASTA sequence (with Ile4Met substitution) for human *TNNC1* (UniProt P63316) or Ensemble transcript ID (ENST00000232975). MutPred2 score: 0.569. MutationTaster probability: 0.999.

**Table S2. cTnT-cTnI intersubunit cross-linked residues**

| <b>cTnT</b> | <b>cTnI</b> |
|-------------|-------------|
| K197        | K117        |
| K197        | K120        |
| K200        | K117        |
| K207        | K117        |
| K207        | K120        |
| K255        | K117        |
| K258        | K117        |
| K258        | K120        |
| K273        | K138        |

Verified cTnT and cTnI intersubunit BS3 cross-links identified in the “dark band” (Fig. 5A).

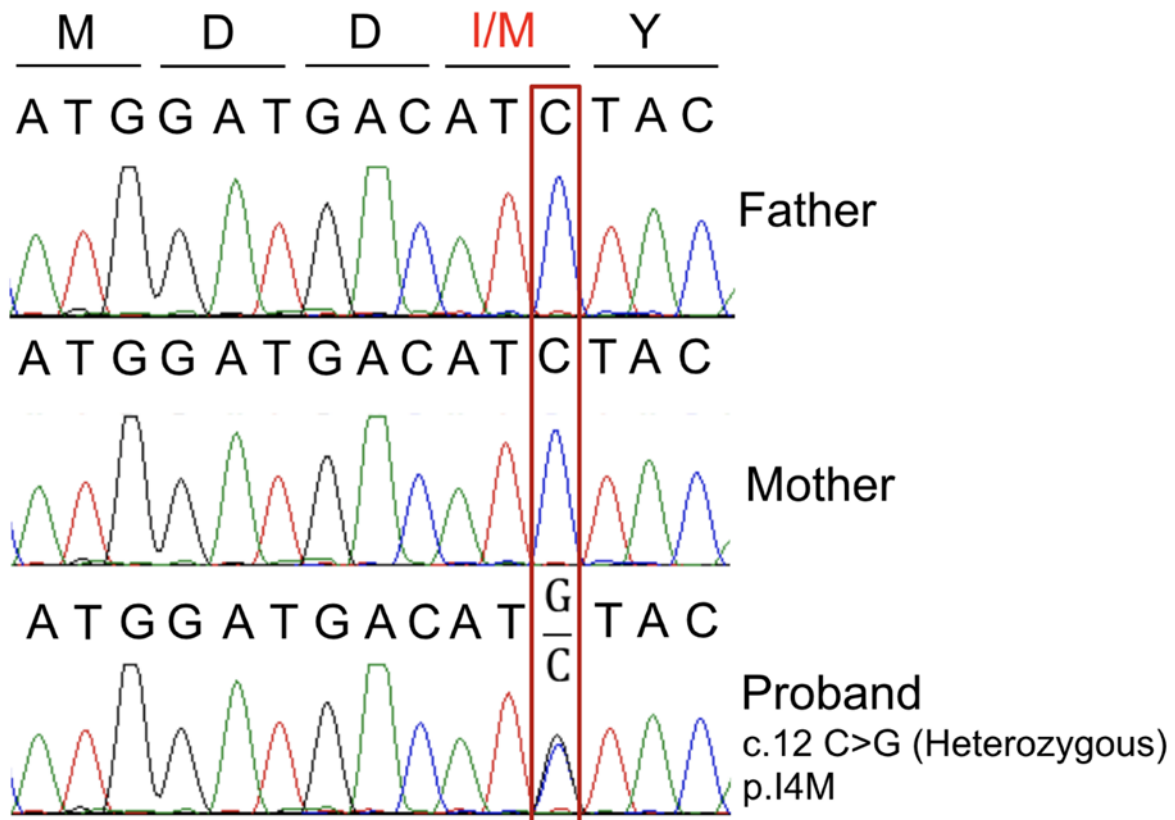

**Fig. S1.** Trio whole exome sequencing chromatograms. The first 5 codons in exon 1 of *TNNC1* are shown with their respective amino acid residues (single letter notation). Red box indicates the position at which the substitution occurred in the proband. Tracings: green, adenine (A); red, thymine (T); black, guanine (G); blue, cytosine (C). Note the presence of signals from both G and C at the 12<sup>th</sup> nucleotide position (12 C>G) in the proband, indicating heterozygosity.

*Modulation of Contractile Force by Cardiac Troponin-T and Troponin-C Interactions*

|            |                                                              |
|------------|--------------------------------------------------------------|
| Zebrafish  | MNDIYKAAAEQLTDEQKNEFRAAFDIFVQDAEDGCISTKELGKVMRMLGQNPTPEELQEM |
| Chicken    | MDDIYKAAVEQLTEEQKNEFKAAFDIFVLGAEDGCISTKELGKVMRMLGQNPTPEELQEM |
| Bovine     | MDDIYKAAVEQLTEEQKNEFKAAFDIFVLGAEDGCISTKELGKVMRMLGQNPTPEELQEM |
| Pig        | MDDIYKAAVEQLTEEQKNEFKAAFDIFVLGAEDGCISTKELGKVMRMLGQNPTPEELQEM |
| Sheep      | MDDIYKAAVEQLTEEQKNEFKAAFDIFVLGAEDGCISTKELGKVMRMLGQNPTPEELQEM |
| Human      | MDDIYKAAVEQLTEEQKNEFKAAFDIFVLGAEDGCISTKELGKVMRMLGQNPTPEELQEM |
| Chimpanzee | MDDIYKAAVEQLTEEQKNEFKAAFDIFVLGAEDGCISTKELGKVMRMLGQNPTPEELQEM |
| Rabbit     | MDDIYKAAVEQLTEEQKNEFKAAFDIFVLGAEDGCISTKELGKVMRMLGQNPTPEELQEM |
| Mouse      | MDDIYKAAVEQLTEEQKNEFKAAFDIFVLGAEDGCISTKELGKVMRMLGQNPTPEELQEM |
| Rat        | MDDIYKAAVEQLTEEQKNEFKAAFDIFVLGAEDGCISTKELGKVMRMLGQNPTPEELQEM |
| Dog        | MDDIYKAAVEQLTEEQKNEFKAAFDIFVLGAEDGCISTKELGKVMRMLGQNPTPEELQEM |
| Cat        | MDDIYKAAVEQLTEEQKNEFKAAFDIFVLGAEDGCISTKELGKVMRMLGQNPTPEELQEM |
|            | *:*****.****:*****:*****.*****                               |

**Fig. S2.** Multiple protein sequence alignment of *TNNC1* across various species. Red box indicates the conserved isoleucine (I) at position 4 in the primary amino acid sequence.

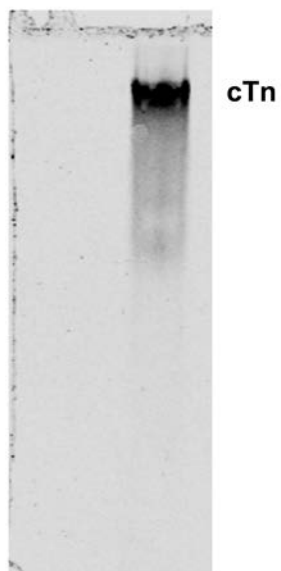

**Fig. S3.** Coomassie-stained native gel (4% stacking, 8% resolving) analysis of wild-type cTn.

## Modulation of Contractile Force by Cardiac Troponin-T and Troponin-C Interactions

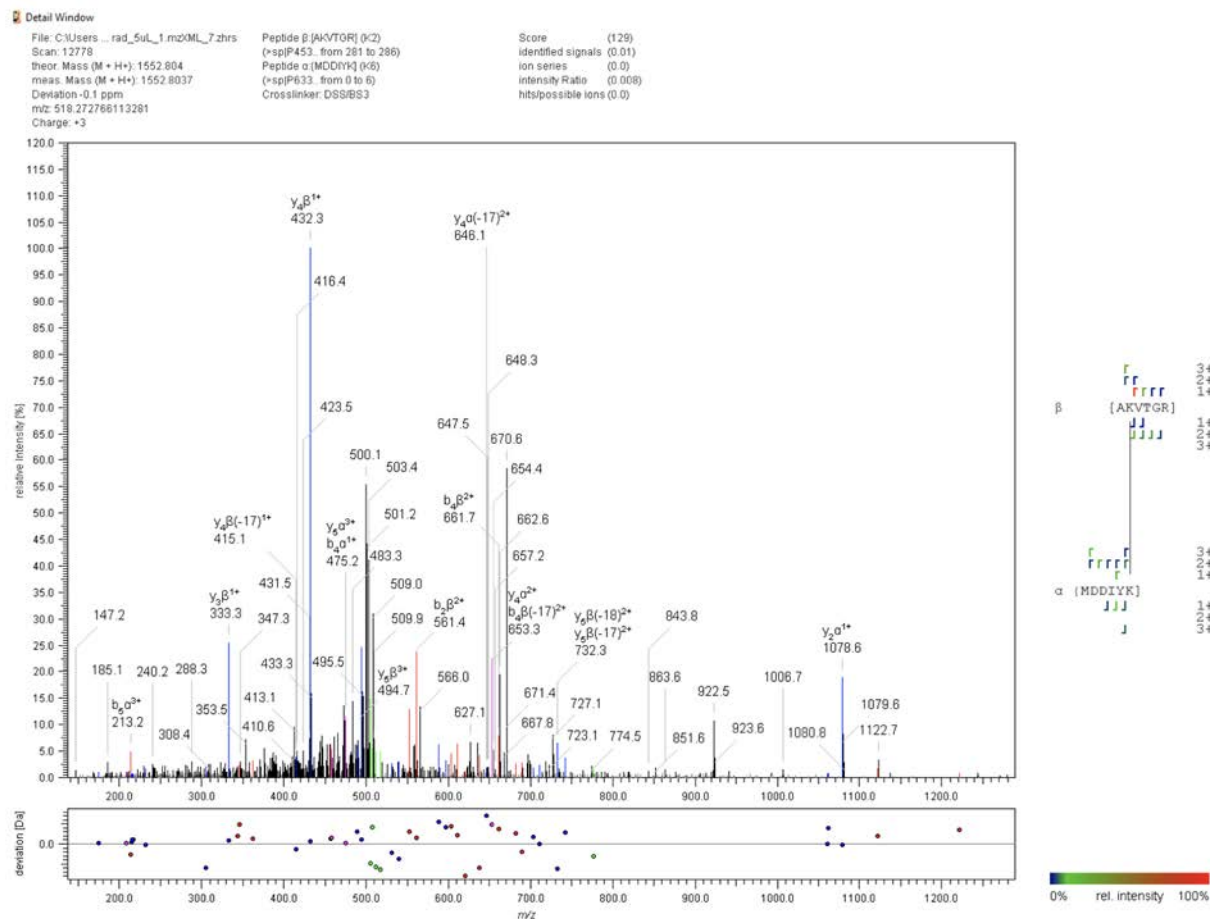

**Fig. S4.** Observed MS2 of the precursor ion  $m/z$  of 518.2721 corresponding to the cross-linked peptides between cTnT-K282 and cTnC-K6. Complete sequence coverage allows for localization of the cross-linking sites.

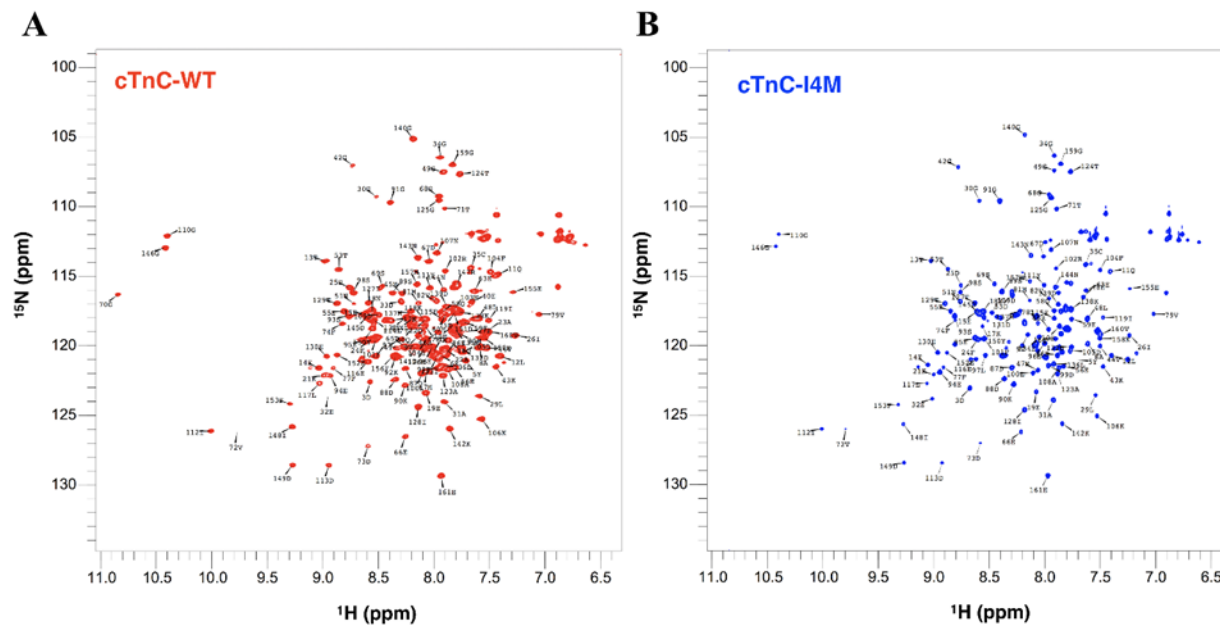

**Fig. S5.** Individual  $^1\text{H}$ - $^{15}\text{N}$  HSQC spectra for (A) cTnC-WT and (B) cTnC-I4M. The  $^1\text{H}$ - $^{15}\text{N}$  assignment for cTnC-I4M was obtained by cross-peak transferring from our previous cTnC-WT assignment. For further details please see Experimental Procedures.



1. Pejaver, V., Urresti, J., Lugo-Martinez, J., Pagel, K. A., Lin, G. N., Nam, H.-J., Mort, M., Cooper, D. N., Sebat, J., Iakoucheva, L. M., Mooney, S. D., and Radivojac, P. (2017) MutPred2: inferring the molecular and phenotypic impact of amino acid variants. *bioRxiv*, 134981
2. Adzhubei, I. A., Schmidt, S., Peshkin, L., Ramensky, V. E., Gerasimova, A., Bork, P., Kondrashov, A. S., and Sunyaev, S. R. (2010) A method and server for predicting damaging missense mutations. *Nat Methods* **7**, 248-249
3. Schwarz, J. M., Cooper, D. N., Schuelke, M., and Seelow, D. (2014) MutationTaster2: mutation prediction for the deep-sequencing age. *Nat Methods* **11**, 361-362
4. Kumar, P., Henikoff, S., and Ng, P. C. (2009) Predicting the effects of coding non-synonymous variants on protein function using the SIFT algorithm. *Nat Protoc* **4**, 1073-1081
